# Supplementary material
Source: ML conference proceedings conference paper supplement (https://openreview.net/forum?id=qWtmNpgjD5K)
Supplement: supplementary_material [file attachment]

## 436 Appendix

437 The appendix is organized as follows: We will first give an extended discussion of related work (**A2**  
438 **Related Work**). We then give a small extension to our taxonomy to deal with sample-based decision  
439 makers (**A2 Formal Setup**). We will then give the proofs of Section 4 (**A4 Can there be a generic**  
440 **fair representation?**). We then give an extended version of Section 5, which includes definitions  
441 of the assumptions made in Theorem 2 and the proofs of the section (**A5 Fairness of a feature**  
442 **set vs fairness of a feature**). Following this we give the proofs of Section 6 (**A6 Impossibility of**  
443 **adversarially fair representations with respect to predictive rate parity**). Lastly, we give some  
444 characterizations in terms of the underlying distribution of the representation fairness notions defined  
445 in our setup section (**A7 Characterizations of different notions of fair representation**).

### 446 A2 Related Work

447 There is an apparent discrepancy between our impossibility results and the long list of papers claiming  
448 to achieve fair representations ([16, 11, 15, 7, 4, 12]). What is the source of that discrepancy? Note  
449 that there is a difference in the setup of the problem; in most of the papers that claim positive  
450 results about fair representations, the designer of the fair representation has access to the data  
451 distribution w.r.t. which the fairness is being evaluated (to the unlabeled marginal distribution for  
452 demographic/statistical parity, and to the full labeled distribution for obtaining Odds Equality fairness).  
453 However, in this paper, we address the possibility of having a fixed data representation that can be  
454 used by learning agents down the road for different classification tasks.

455 In many cases the assumptions about the connection between the data available at the times of  
456 designing the representation and the tasks it will be used for remains implicit, though. For example  
457 [16] define their notion of fairness by saying: "We formulate this using the notion of statistical parity,  
458 which requires that the probability that a random element from  $X^+$  maps to a particular prototype is  
459 equal to the probability that a random element from  $X^-$  maps to the same prototype" (where  $X^+$   
460 and  $X^-$  are the two groups w.r.t. which one aims to respect fairness). However, they do not specify  
461 what is the meaning of "a random element". The natural interpretation of these terms is that "random"  
462 refers to the uniform distribution over the finite set of individuals over which the algorithm selects. In  
463 that case, that information varies with each concrete tasks and is not available to the task-independent  
464 representation designer. Alternatively, one could interpret those "random" selections as picking  
465 uniformly at random from some predetermined large training set (or data repository) that is fixed for  
466 all downstream tasks. Such randomness may well be available to the representation designer, but it  
467 misses the intention of statistical parity fairness; For example, the fixed training set there are 10,000  
468 individuals from one group and 20,000 from the other group, but when a bank comes to allocate  
469 loans they have 30 applicants from the first group and 100 applicants from the other. For the fairness  
470 of these loan allocation decisions, the relevant ratio between the groups is 30/100 rather than the  
471 10,000/20,000 ratio available to the representation designer.

472 Below we refer in some more detail to several well cited papers discussion the design of fair data  
473 representations for the use of classification learning by agents using that data.

474 **Zemel et al 2013 [16]** "our intermediate representation can be used for other classification tasks (i.e.,  
475 transfer learning is possible)". "We further posit that such an intermediate representation is  
476 fundamental to progress in fairness in classification, since it is composable and not ad hoc;  
477 once such a representation is established, it can be used in a blackbox fashion to turn any  
478 classification algorithm into a fair classifier, by simply applying the classifier to the sanitized  
479 representation of the data." "Hence the mutual information between Z and S is small, and  
480 we have accomplished the goal of obfuscating information about the protected group." Here  
481 Z is the representation and S is the group membership.

482 There are two significant issues with this approach. First, as mentioned above, the algorithm  
483 generating the representation can have access only to some fixed data distribution. A  
484 distribution that is likely to be irrelevant for specific "blackbox fashion" usage by agents  
485 addressing specific classification problems down the road. A second issue has to do with  
486 the adherence to statistical parity fairness. Any classification based on statistically fairness  
487 respecting representation will be inaccurate to the extent that the ground truth and the group  
488 membership are correlated.

489 **Madras et al 2018 [11]** Address the second concern above by saying: "However, assuring that  
490 prediction vendors learn only fair predictors complicates the data owner's choice of repre-  
491 sentation, which must yield predictors that are never unfair but nevertheless have relatively  
492 high utility." "We connect common group fairness metrics (demographic parity, equalize  
493 odds, and equal opportunity) to adversarial learning by providing appropriate adversarial  
494 objective functions for each metric that upper bounds the unfairness of arbitrary downstream  
495 classifiers" (center of right columns on page 1). This is exactly what our paper shows  
496 to be impossible. How do they overcome this impossibility? In section 4.2 "Learning"  
497 - the algorithm requires the labels (the value of Y there) of the training examples. Thus  
498 the representation will change from one "downstream" classifier to another and cannot be  
499 constructed in an a priori fashion, in contrast to what the paper's introduction seems to  
500 imply.

501 **Song et al 2019 [15]** The focus of this work is algorithmic efficiency of contracting some type of  
502 fair representation. The representation building algorithms optimize several objectives that  
503 vary with the type of fairness they are set to guarantee and well as with the 'expressiveness'  
504 of the representation. To achieve their fairness goal, the algorithms require access to the  
505 target problem data distribution (the marginal for demographic parity and the full labeled  
506 distribution for other notions of group fairness). The notion of expressiveness is related  
507 to the specific task (or objective) that the algorithms using then representation is aimed to  
508 solve. Consequently, the resulting representations are not useful down the road tasks that  
509 the representation designer has no samples from.

510 **Edwards et al 2017 [7]** Propose an algorithm for constructing fair data representation ALFR "The  
511 advantage of the latter (ALFR) approach is that the representations can potentially be reused  
512 for different tasks, and there is the possibility of a separation of concerns whereby one  
513 party is responsible for making the representations fair, and another party is responsible for  
514 making the best predictive model...In addition our approach means that the *representations*  
515 *can be used with any classifier*". However, they discuss only Statistical Parity and suffer the  
516 same deficiency we described above - the resulting representation fails to guarantee fairness  
517 for tasks with data distributing different than the one used to train the representation. Their  
518 promise "can potentially be reused for different tasks" can be met only in the very limited  
519 case of tasks sharing the training distribution.

520 **Creager et al 2019 [4]** Focus on Demographic Parity. In the Discussion section they pose two  
521 followup problems: "There are two main directions of interest for future work. First is the  
522 question of fairness metrics: a wide range of fairness metrics beyond demographic parity  
523 have been proposed (Hardt et al., 2016; Pleiss et al., 2017). Understanding how to learn  
524 flexibly fair representations with respect to other metrics is an important step in extending  
525 our approach. Secondly, robustness to distributional shift presents an important challenge in  
526 the context of both disentanglement and fairness" **We prove that both desired extensions**  
527 **are unattainable!**

528 **Zhao et al [19, 18]** The data representation discussed in these papers are only meant for the given  
529 task it is trained over. It is therefore essentially different from the scenario of multi-task  
530 fairness providing represnetation that our paper discusses.

531 **McNamara-Williamson 2019 "costs" [12]** Address a different setup of fair representations. Rather  
532 than fixing such a representation for use of down the road classification tasks, they view it  
533 as a tool for a data curator to prevent intentional unfairness by an agent using that data *for a*  
534 *specific predetermined task* that the representation building algorithm has access to samples  
535 from. Therefore this work is orthogonal to our discussion.

536 **Oneto et al "transferable" 2019 [13]** The motivation is to learn a representation based on some  
537 tasks that will make the fair and accurate learning of new, similar tasks more sample efficient.  
538 This has a similar flavor to our notion of accuracy-driven agents. The fairness notion used in  
539 this paper is demographic parity though. They consider multi-task in the sens of multiple  
540 labelling rules for the same marginal distribution. And they show that the utility transfers  
541 while demographic parity is still satisfied. Since the tasks for which such a representations  
542 intended all share the same marginal data distribution, the ability to guarantee demographic  
543 parity is consistent with our results (although, as mentioned above, such an approach suffers  
544 from the restriction of tasks to sharing a fixed marginal and from the potential accuracy  
545 costs implied by respecting statistical parity).

546 **A3 Formal Setup**

547 **Extended taxonomy:  $\lambda$ -robustness**

548 It is not necessarily sufficient that the requirement of accuracy-driven fairness of a representation  
 549 is not sufficient to guarantee that accuracy-driven decision makers actually arrive at a fair decision  
 550 rule, if they do not have access to the underlying distribution  $P$  but only to a finite i.i.d sample of  
 551 the distribution. For this, we would need to further require that any decision with close to optimal  
 552 accuracy has good fairness. This motivates the definition of  $\lambda$ -robustness.

553 **Definition 7** ( $\lambda$ -robust fairness). *A feature set  $\mathcal{F}$  is considered to be  $\lambda$ -robustly fair w.r.t.*  
 554 *the fairness objective  $L^{fair}$  and the distribution  $P$ , if for every  $\alpha \in [0, 1]$  every classifier*  
 555  *$h \in \mathcal{H}_F$  with  $L_P^\alpha(h) \leq \min_{h \in \mathcal{H}_F} L_P^\alpha(h) + \epsilon$  has group unfairness bounded by  $L_P^{fair}(h) \leq$*   
 556  *$\min_{h \in \arg \min_{h' \in \mathcal{H}_F} L_P^\alpha(h')} L_P^{fair}(h) + \lambda\epsilon$ . Similar to above definition, we say representation  $\mathcal{F}$*   
 557 *is  $\lambda$ -robustly fair w.r.t. to  $L^{fair}$ ,  $P$  and  $\alpha$  if the guarantee above holds for a particular threshold  $\alpha$ .*

558 Note that, if a representation is both accuracy-driven fair and  $\lambda$ -robust fair, an accuracy-driven  
 559 decision maker, who bases their decision on an i.i.d. sample of that representation, is guaranteed to  
 560 arrive at a fair decision rule with high probability over the sample generation, if the sample size is  
 561 sufficient to guarantee accuracy.

562 **A4 Can there be a generic fair representation?**

563 **Proofs**

564 **Corollary 1.** *No data representation can guarantee the DP fairness of any non-trivial classifier w.r.t.*  
 565 *all possible data generating distributions (over any fixed domain set with any fixed partition into*  
 566 *non-empty groups). That is, any non-constant representation  $F$ , cannot be adversarially fair with*  
 567 *respect to  $L^{DP}$  and any arbitrary task  $P$ .*

568 **Proof of Corollary 1:** For any non-constant function  $f$ , we have seen that there exists a marginal  $P_X$   
 569 such that  $f$  does not fulfill demographic parity with respect to  $P_X$  (Claim 1). Now if a representation  
 570  $F$  is non-constant, it allows some non-constant function using that representation. Thus no non-  
 571 constant representation can fulfill adversarial demographic parity with respect to any distribution  $P$ .  
 572  $\square$

573 **Claim: 2.**

574 *For every function non-constant function  $f : X \rightarrow \{0, 1\}$  and every non-constant classifier  $h : X \rightarrow$*   
 575  *$\{0, 1\}$  with  $h \neq f$  and  $h \neq 1 - f$  (where  $1$ , denotes the function that maps every element to 1), there*  
 576 *exists a marginal  $P_X$ , such that  $h$  has high unfairness with respect to  $L^{EO}$  and  $P = (P_X, f)$ , (i.e.*  
 577  *$L_P^{EO}(h) \geq 0.5$ ).*

578 *Let  $f : X \rightarrow \{0, 1\}$  be any function and  $h : X \rightarrow \{0, 1\}$  be any classifier such that  $h$  is non-*  
 579 *committing with respect to ground-truth  $f$ , i.e. none of the subsets  $\{x \in X : f(x) = l_1, h(x) =$*   
 580  *$l_2, G(x) = g\}$  for any  $g \in \{A, D\}$  and  $l_1, l_2 \in \{0, 1\}$  is empty. Then there exists a marginal  $P_X$ ,*  
 581 *such that  $h$  is arbitrarily unfair with respect to  $L^{EO}$  and  $P = (P_X, f)$ , (i.e.  $L_P^{EO}(h) \geq 0.9$ ).*

582 **Proof of Claim 2:**

583 1. Let  $f : X \rightarrow \{0, 1\}$  be any non-constant function and  $h : X \rightarrow \{0, 1\}$  be any non-constant  
 584 classifier with  $h \neq f, 1 - f$ . Then we know that at least three of the four sets  $\{x \in X :$   
 585  $f(x) = 1, h(x) = 0\}$ ,  $\{x \in X : f(x) = 0, h(x) = 1\}$ ,  $\{x \in X : f(x) = 1, h(x) = 1\}$   
 586 and  $\{x \in X : f(x) = 0, h(x) = 0\}$  are non-empty. Thus two of these three sets, agree  
 587 on the ground truth. Call them  $B_1$  and  $B_2$  (and let the remaining set be  $B_3$ ). W.l.o.g.  
 588  $B_1 = \{s \in X : f(x) = 1, h(x) = 0\}$ ,  $B_2 = \{s \in X : f(x) = 1, h(x) = 1\}$ .

- 589 • Case 1:  $B_1 \cap A \neq \emptyset$  and  $B_2 \cap D \neq \emptyset$ . Then we can choose the marginal  $P_X$  as  
 590  $P_X(B_1 \cap A) = 0.5$  and  $P_X(B_2 \cap D) = 0.5$ . Yielding,  $L_P^{EO}(h) = 0.5$
- 591 • Case 2:  $B_2 \cap A \neq \emptyset$  and  $B_1 \cap D \neq \emptyset$ : Analogous to Case 1

592  
593  
594  
595  
596  
597  
598

- Case 3: there is  $G \in \{A, D\}$ , such that  $B_1 \cap G = B_2 \cap G = \emptyset$ . W.l.o.g.  $G = A$ . Then  $B_3 \cap A \neq \emptyset$  and  $B_1 \cap D \neq \emptyset$  and  $B_2 \cap D \neq \emptyset$ . In this case we can choose the marginal as  $P_X(A \cap B_3) = 0.5$  and  $P_X(D \cap B_1) = 0.5$ . Then all elements of  $D$  will be misclassified and all elements of  $A$  will either be classified correctly or be misclassified in the opposite direction, yielding to high EO unfairness. (In the case where the ground truth labeling is constant on one group, we define the misclassification rate with respect to the label it will not achieve to be zero. Then we get  $L_P^{EO}(h) \geq 0.5$ .)

2. We can choose the marginal  $P_X$  as follows:

$$\begin{aligned}
P_X(\{x \in X : G(x) = A, f(x) = 1, h(x) = 1\}) &= 0.25 \\
P_X(\{x \in X : G(x) = A, f(x) = 1, h(x) = 0\}) &= 0 \\
P_X(\{x \in X : G(x) = A, f(x) = 0, h(x) = 1\}) &= 0.25 \\
P_X(\{x \in X : G(x) = A, f(x) = 0, h(x) = 0\}) &= 0 \\
P_X(\{x \in X : G(x) = D, f(x) = 1, h(x) = 1\}) &= 0 \\
P_X(\{x \in X : G(x) = D, f(x) = 1, h(x) = 0\}) &= 0.25 \\
P_X(\{x \in X : G(x) = D, f(x) = 0, h(x) = 1\}) &= 0 \\
P_X(\{x \in X : G(x) = D, f(x) = 0, h(x) = 0\}) &= 0.25
\end{aligned}$$

599

The resulting unfairness is  $L_P^{EO}(h) = 1$ .

600

□

601  
602  
603  
604  
605

**Corollary 2.** *No data representation can guarantee EO fairness of any non-constant predictor based on that representation for all "downstream" classification learning tasks. That is, any representation  $F$  that is not constant on any group, cannot be adversarially fair with respect to  $L^{EO}$  and any arbitrary task  $P$ . This holds even if one restricts the claim to tasks sharing a fixed marginal data distribution.*

606  
607  
608  
609  
610  
611

**Proof of Corollary 2:** For any ground truth  $f : X \rightarrow \{0, 1\}$  and any representation  $F : X \rightarrow Z$ , that allows  $h : Z \rightarrow \{0, 1\}$  as described in Claim 2, there exists a marginal  $P_X$  such that  $h$  is highly EO unfair with respect to  $(P_X, f)$ . Note that as long as  $h$  is not constant on either group, we can find  $P$ , such that the requirements from Claim 2 are fulfilled. Thus the representation is not adversarially fair with respect to  $(P_X, f)$  and  $L^{EO}$ . Thus any sufficiently complex representation cannot guarantee fairness for every possible covariate shift. □

612  
613  
614  
615  
616

**Lemma 1.** *Let  $P_1$  and  $P_2$  be the distributions defining two different tasks with the same marginal  $P_X = P_{1,X} = P_{2,X}$  such that at least one of the tasks does not have equal success rates. Let  $h_1, h_2 : X \rightarrow \{0, 1\}$  be such that  $L_{P_1}(h_1) = L_{P_2}(h_2) = 0$ , and assume that tasks are non-negligibly different (namely,  $L_{P_1}(h_2) \neq 0$ ). Then, it cannot be the case that both  $h_1$  and  $h_2$  are EO fair w.r.t. both  $P_1$  and  $P_2$ .*

617

**Proof of Lemma 1:**

Let  $P_1$  and  $P_2$  be the distributions defining two different tasks with the same marginal  $P_X = P_{1,X} = P_{2,X}$  such that at least one of the tasks does not have equal success rates. Let  $h_1, h_2 : X \rightarrow \{0, 1\}$  be such that  $L_{P_1}(h_1) = L_{P_2}(h_2) = 0$ , and assume that tasks are non-negligibly different (namely,  $L_{P_1}(h_2) \neq 0$ ). The easiest way to verify our claim is to realize that  $h_1$  being fair w.r.t. to  $P_2$  and equalized odds is equivalent to  $h_2$  being fair w.r.t.  $P_1$  and predictive rate parity. It is known [10] that this can only be fulfilled if the ground-truth has equal success rates. We will now give a more detailed proof of our claim. For the sake of contradiction let us assume that both  $h_1$  and  $h_2$  are EO fair w.r.t. both  $P_1$  and  $P_2$ . As  $L_{P_1}(h_2) \neq 0$ , we know that  $\mathbb{P}_{x \sim P_1}[h_2(x) = 1, h_1(x) = 0]$  or  $\mathbb{P}_{x \sim P_1}[h_2(x) = 0, h_1(x) = 1]$  to be non-zero. W.l.o.g. assume that  $\mathbb{P}_{x \sim P_1}[h_2(x) = 1, h_1(x) = 0] \neq 0$ . We then know from  $h_2$  fulfilling EO fairness with respect to  $P_1$ , that

$$\mathbb{P}_{x \sim P_X}[h_2(x) = 1 | G(x) = A, h_1(x) = 0] = \mathbb{P}_{x \sim P_X}[h_2(x) = 1 | G(x) = D, h_1(x) = 0].$$

This implies

$$\frac{\mathbb{P}_{x \sim P_X}[h_1(x) = 1, h_2(x) = 1, G(x) = A]}{\mathbb{P}_{x \sim P_X}[h_1(x) = 0, h_2(x) = 1, G(x) = A]} = \frac{\mathbb{P}_{x \sim P_X}[h_1(x) = 1, h_2(x) = 1, G(x) = D]}{\mathbb{P}_{x \sim P_X}[h_1(x) = 0, h_2(x) = 1, G(x) = D]}.$$

Thus there exists some  $\beta_1$  such that:

$$\mathbb{P}_{x \sim P_X}[h_1(x) = 1, h_2(x) = 1, G(x) = A] = \beta_1 \mathbb{P}_{x \sim P_X}[h_1(x) = 0, h_2(x) = 1, G(x) = A]$$

and

$$\mathbb{P}_{x \sim P_X}[h_1(x) = 1, h_2(x) = 1, G(x) = D, ] = \beta_1 \mathbb{P}_{x \sim P_X}[h_1(x) = 0, h_2(x) = 1, G(x) = D].$$

Furthermore from  $h_1$  fulfilling EO fairness with respect to  $P_2$ , we know

$$\mathbb{P}_{x \sim P_X}[h_1(x) = 0|G(x) = A, h_2(x) = 1] = \mathbb{P}_{x \sim P_X}[h_1(x) = 0|G(x) = D, h_2(x) = 1].$$

This implies

$$\frac{\mathbb{P}_{x \sim P_X}[h_1(x) = 0, h_2(x) = 0, G(x) = A]}{\mathbb{P}_{x \sim P_X}[h_1(x) = 0, h_2(x) = 1, G(x) = A]} = \frac{\mathbb{P}_{x \sim P_X}[h_1(x) = 0, h_2(x) = 0, G(x) = D, ]}{\mathbb{P}_{x \sim P_X}[h_1(x) = 0, h_2(x) = 1, G(x) = D]}.$$

Thus there exists some  $\beta_2$  such that:

$$\mathbb{P}_{x \sim P_X}[h_1(x) = 0, h_2(x) = 0, G(x) = A] = \beta_1 \mathbb{P}_{x \sim P_X}[h_1(x) = 0, h_2(x) = 1, G(x) = A]$$

and

$$\mathbb{P}_{x \sim P_X}[h_0(x) = 1, h_0(x) = 1, G(x) = D, ] = \beta_2 \mathbb{P}_{x \sim P_X}[h_1(x) = 0, h_2(x) = 1, G(x) = D].$$

618 Now there are two cases.

- Case 1:  $\mathbb{P}_{x \sim P_X}[h_2(x) = 0, h_1(x) = 1] = 0$ . Then

$$\mathbb{P}_{x \sim P_1}[h_1(x) = 0, h_2(x) = 1|G(x) = A] = \mathbb{P}_{x \sim P_1}[h_1(x) = 0, h_2(x) = 1, G(x) = D] = 0$$

. We then have

$$\mathbb{P}_{x \sim P_X}[h_1(x) = 0|G(x) = A] = \frac{1 + \beta_2}{1 + \beta_1 + \beta_2} = \mathbb{P}_{x \sim P_x}[h_2(x) = 1|G(x) = D]$$

. Thus  $P_1$  fulfills demographic parity. Similarly,

$$\mathbb{P}_{x \sim P_X}[h_2(x) = 1|G(x) = A] = \frac{1 + \beta_1}{1 + \beta_1 + \beta_2} = \mathbb{P}_{x \sim P_x}[h_2(x) = 1|G(x) = D]$$

619

. Which implies that  $P_2$  also fulfills demographic parity, contradicting our assumption.

- Case 2:  $\mathbb{P}_{x \sim P_X}[h_2(x) = 0, h_1(x) = 1] \neq 0$ . Then

$$\mathbb{P}_{x \sim P_X}[h_1(x) = 1|G(x) = A, h_2(x) = 0] = \mathbb{P}_{x \sim P_X}[h_1(x) = 1|G(x) = D, h_2(x) = 0].$$

620

$$- \text{Case 2.1: } \mathbb{P}_{x \sim P_X}[h_2(x) = 0, h_1(x) = 0] = \mathbb{P}_{x \sim P_X}[h_2(x) = 1, h_1(x) = 1] = 0.$$

621

$$\text{In this case } \mathbb{P}_{x \sim P_X}[h_1(x) = 1|G(x) = A, h_2(x) = 0] = \mathbb{P}_{x \sim P_X}[h_1(x) =$$

622

$$1|G(x) = D, h_2(x) = 0] = 1 \text{ and } \mathbb{P}_{x \sim P_X}[h_1(x) = 0|G(x) = A, h_2(x) = 1] =$$

623

$$\mathbb{P}_{x \sim P_X}[h_1(x) = 0|G(x) = D, h_2(x) = 1] = 1. \text{ This implies demographic parity for}$$

624

$P_1$  and for  $P_2$  contradicting our initial assumptions.

$$- \text{Case 2.2. } \mathbb{P}_{x \sim P_X}[h_2(x) = 0, h_1(x) = 0] \neq 0 \text{ or } \mathbb{P}_{x \sim P_X}[h_2(x) = 1, h_1(x) = 1] \neq 0.$$

w.l.o.g.  $\mathbb{P}_{x \sim P_X}[h_2(x) = 1, h_1(x) = 1] \neq 0$ . This implies

$$\frac{\mathbb{P}_{x \sim P_X}[h_1(x) = 1, h_2(x) = 0, G(x) = A]}{\mathbb{P}_{x \sim P_X}[h_1(x) = 1, h_2(x) = 1, G(x) = A]} = \frac{\mathbb{P}_{x \sim P_X}[h_1(x) = 1, h_2(x) = 0, G(x) = D, ]}{\mathbb{P}_{x \sim P_X}[h_1(x) = 1, h_2(x) = 1, G(x) = D]}.$$

Thus there exists some  $\beta_3$  such that:

$$\mathbb{P}_{x \sim P_X}[h_1(x) = 1, h_2(x) = 0, G(x) = A] = \beta_3 \mathbb{P}_{x \sim P_X}[h_1(x) = 1, h_2(x) = 1, G(x) = A]$$

and

$$\mathbb{P}_{x \sim P_X}[h_1(x) = 1, h_2(x) = 0, G(x) = D] = \beta_3 \mathbb{P}_{x \sim P_X}[h_1(x) = 1, h_2(x) = 1, G(x) = D]$$

. We then have

$$\mathbb{P}_{x \sim P_X}[h_1(x) = 0|G(x) = A] = \frac{1 + \beta_2}{1 + \beta_1 + \beta_2 + \beta_1 \beta_3} = \mathbb{P}_{x \sim P_x}[h_2(x) = 1|G(x) = D]$$

. Thus  $P_1$  fulfills demographic parity. Similarly,

$$\mathbb{P}_{x \sim P_X}[h_2(x) = 1|G(x) = A] = \frac{1 + \beta_1}{1 + \beta_1 + \beta_2 + \beta_1 \beta_3} = \mathbb{P}_{x \sim P_x}[h_2(x) = 1|G(x) = D]$$

625

. Which implies that  $P_2$  also fulfills demographic parity, contradicting our assumption.

626  $\square$

627 **Theorem 1.** *There can be no data representation  $F$  such that for some  $P_1, P_2$  as above, the following*  
628 *criteria simultaneously hold:*

- 629 1.  $F$  is adversarially fair w.r.t.  $P_1$  and EO
- 630 2.  $F$  is adversarially fair w.r.t.  $P_2$  and EO
- 631 3.  $F$  allows for perfect accuracy w.r.t. to  $P_1$  and  $P_2$ , i.e. there are  $h_1, h_2$  both expressible over  
632 the representation  $F$ , such that  $L_{P_1}(h_1) = L_{P_2}(h_2) = 0$ .

633 **Proof of Theorem 1:** We note that in order for  $F$  being adversarially EO fair with respect to both  
634  $P_1$  and  $P_2$ , both  $h_1$  and  $h_2$  need to be EO fair with respect to  $P_1$  and  $P_2$ , from Lemma 1, we know  
635 that this implies that either  $P_1 = P_2$  or that both  $P_1$  and  $P_2$  have equal success rates. Thus we have  
636 proven our claim.  $\square$

## 637 A5 Fairness of a feature set vs. fairness of a feature

### 638 Assumptions for Theorem 2

639 We now give an explicit definition for the assumptions made in Theorem 2.

### 640 Non-Triviality properties

641 **Definition 8.** *We define the following two non-triviality requirements for a feature:*

- 642 1. **Non-committing** *We will call a feature non-committing if it leaves some ambiguity about*  
643 *label and group membership. That is, a feature  $f$  is non-committing if there are two distinct*  
644 *values  $y_1$  and  $y_2$ , such that  $f$  assigns each of these values to at least one instance of*  
645 *each  $X_{A,0}, X_{A,1}, X_{D,1}, X_{D,0}$ . i.e.  $f^{-1}(y_1) \cap X_i \neq \emptyset$  and  $f^{-1}(y_2) \cap X_i \neq \emptyset$  for every*  
646  *$X_i \in \{X_{A,0}, X_{A,1}, X_{D,1}, X_{D,0}\}$*
- 647 2.  **$k$ -anonymity** *A feature  $f$  is  $k$ -anonymous if knowing this feature, group-membership and*  
648 *label, will only reveal identity of an individuals up to a set of at least  $k$  individuals. Namely,*  
649 *for every combination of value of this feature, group membership and class label, there are*  
650 *either no instances satisfying this combination or there are at least  $k$  many such instances.*

651 Another concept we need in order to prove the theorem are feature-induced cells. A set of features  
652  $\mathcal{F} = \{f_1, \dots, f_n\}$  induces an equivalence relation  $\sim_{\mathcal{F}}$ , by  $x \sim_{\mathcal{F}} y$  iff  $f_i(x) = f_i(y)$  for all  $i =$   
653  $1, \dots, n$ . We call the equivalence classes with respect to  $\sim_{\mathcal{F}}$  cells and denote the set of cells for a  
654 featureset  $\mathcal{F}$  as  $\mathcal{C}_{\mathcal{F}}$ .

655 As this theorem will consider accuracy-driven fairness, we will give a shortly introduce the Bayes  
656 optimal classifier. First, we need to consider the scores that are induced by a probability distribution.

657 We define the *ground truth score function*  $s_t : \mathcal{C}_{\mathcal{F}} \rightarrow [0, 1]$ .  $s_t^P(C)$  is the probability, w.r.t.  $P$ , of  
658  $x \in C$  having the true-label 1, i.e.,  $s_t^P(C) = \mathbb{E}_{x \sim P}[t(x)|x \in C]$ . In cases where the distribution is  
659 unambiguous we will use the abbreviated notation  $s_t$  instead of  $s_t^P$ .

660 The predictor in  $\mathcal{H}_F$  that minimizes  $L_P^\alpha$  is the Bayes Optimal predictor  $t_{P,F}^\alpha$  that for a cell  $C \in \mathcal{C}_{\mathcal{F}}$   
661 assigns the label 1 if  $s_t(C) > \alpha$  and 0 otherwise.

### 662 Additional remarks about Theorem 2

663 We have shown in Theorem 2 that for any feature fulfilling some non-triviality requirement, there  
664 exists a distribution  $P$  and two feature sets such that adding  $f$  to the feature sets has opposing effect  
665 on the fairness of the representation in terms of accuracy-driven fairness w.r.t. equalized odds. We  
666 now want to convince the reader that this can be the case for distributions that are not pathological  
667 w.r.t.  $f$ .

668 To see this we will now show an example of this happening when both  $f$  and  $\mathcal{F}$  are ad-  
669 versarially fair w.r.t.  $P$ : Let the domain  $X = \{x_1, x_2, x_3, x_4, x_5, x_6, x_7, x_8, x_9, x_{10}, x_{11}, x_{12}\}$   
670 with  $X_{A,1} = \{x_1, x_2, x_3\}$ ,  $X_{D,1} = \{x_4, x_5, x_6\}$ ,  $X_{A,0} = \{x_7, x_8, x_9\}$ , and  $X_{D,0} =$

671  $\{x_{10}, x_{11}, x_{12}\}$ . Furthermore consider the uniform distribution  $P$  over  $X$ , i.e.  $P(\{x\}) = \frac{1}{12}$   
672 for every  $x \in X$ . For the construction of the feature set, we only consider binary fea-  
673 tures  $f_i : X \rightarrow \{0, 1\}$ . Now let  $f$  be defined by  $f^{-1}(1) = \{x_1, x_5, x_8, x_{12}\}$ . Further-  
674 more, let  $\mathcal{F} = \{f_1, f_2, f_3\}$  and  $\mathcal{F}' = \{f'_1, f'_2\}$  with  $f_1^{-1}(1) = \{x_1, x_2, x_3, x_5, x_8, x_{12}\}$ ,  
675  $f_2^{-1}(1) = \{x_1, x_2, x_3, x_5, x_{11}, x_{12}\}$ ,  $f_3^{-1}(1) = \{x_1, x_4, x_5, x_6, x_7, x_{11}\}$ ,  $f'_1^{-1}(1) =$   
676  $\{x_1, x_4, x_7, x_{10}\}$  and  $f'_2^{-1}(1) = \{x_1, x_2, x_4, x_5, x_7, x_8, x_{10}, x_{11}\}$ . The resulting cells  
677 for  $\mathcal{F}$  and  $\mathcal{F}'$  are  $\mathcal{C}_{\mathcal{F}} = \{\{x_1, x_5\}, \{x_2, x_3, x_{12}\}, \{x_8\}, \{x_4, x_6, x_7\}, \{x_9\}, \{x_{10}, x_{11}\}\}$  and  
678  $\mathcal{C}_{\mathcal{F}'} = \{\{x_1, x_4, x_7, x_{10}\}, \{x_2, x_5, x_8, x_{11}\}, \{x_3, x_6, x_9, x_{12}\}\}$ . It is easy to see that  $\mathcal{F}'$  and  $\{f\}$  are  
679 adversarially fair w.r.t.  $P$  and  $L^{EO}$ . Furthermore, we have:

$$U_{acc}^{\alpha}(\mathcal{F} \cup \{f\}) = \frac{1}{2} \left| \frac{3}{3} - \frac{2}{3} \right| + \frac{1}{2} \left| \frac{2}{3} - \frac{1}{3} \right| = \frac{1}{3} > 0 = U_{acc}^{\alpha}(\mathcal{F})$$

680 and

$$U_{acc}^{\alpha}(\mathcal{F}' \cup \{f\}) = \frac{1}{2} \left| \frac{3}{3} - \frac{3}{3} \right| + \frac{1}{2} \left| \frac{1}{3} - \frac{1}{3} \right| = 0 <$$

681

$$\frac{1}{6} = \frac{1}{2} \left| \frac{3}{3} - \frac{3}{3} \right| + \frac{1}{2} \left| \frac{1}{3} - \frac{0}{3} \right| = U_{acc}^{\alpha}(\mathcal{F}').$$

682 Thus we see that there are indeed features  $f$  which are adversarially fair w.r.t.  $P$  and equalized  
683 odds, for which there is this opposing effect of feature deletion. Moreover, we can give general  
684 criteria for  $f$  and  $P$  which are fulfilled by many pairs  $(f, P)$ , that are sufficient for showing that  
685 the phenomenon from Theorem 2 occurs. In our proof we will show that these criteria are fulfilled  
686 when the non-triviality criteria of Definition 7 are fulfilled. We will now state these criteria. In the  
687 following let  $l \in \{0, 1\}$  denote a label and  $G \in \{A, D\}$  a group. The opposing label and group will  
688 be denoted by  $\bar{l}$  and  $\bar{G}$  respectively. A feature  $f$  is called "generic" with respect to  $P$  if there exist  
689 sets  $C_1, C_2, C_3 \subset X$  with the following properties.

- 690 1.  $P(C_1) > P(C_2)$
- 691 2.  $C_1$  and  $C_2$  are separated by the feature  $f$ , i.e.  $C_1 \subset f^{-1}(l')$  and  $C_2 \subset f^{-1}(1-l')$  for some  
692  $l' \in \{0, 1\}$
- 693 3.  $C_1$  and  $C_2$  are label-homogeneous for different labels and  $C_2$  is group homogeneous, i.e.  
694  $C_1 \subset t^{-1}(l)$  and  $C_2 \subset X_{G, \bar{l}}$ .
- 695 4.  $C_3$  is not split by the feature, i.e.  $C_3 \subset f^{-1}(l'')$  for some  $l'' \in \{0, 1\}$
- 696 5.  $C_3$  has the same majority label as  $C_1$ , i.e.  $P(t^{-1}(l) \cap C_3) \geq P(t^{-1}(\bar{l}) \cap C_3)$
- 697 6. The fraction of elements of group  $\bar{G}$  and label  $\bar{l}$  in  $C_3$  is sufficiently big in comparison to  
698  $C_2$ , i.e.  $\frac{P(C_3 \cap X_{G, \bar{l}})}{P(X_{G, \bar{l}})} \geq \frac{P(C_2)}{P(X_{G, \bar{l}})}$ .

699 For pairs  $(P, f)$  fulfilling such requirements, one can easily construct two representations  $\mathcal{F}$  and  $\mathcal{F}'$   
700 such that deleting  $f$  in the context of  $\mathcal{F}$  will increase unfairness and such that deleting  $f$  in the context  
701 of  $\mathcal{F}'$  decreases unfairness in the spirit of the proof of Theorem 2. We define  $\mathcal{F}$  as a representation  
702 which separates everything but a cell  $C' = C_1 \cup C_2$  by labels. For such a representation  $\cup\{f\}$   
703 enables perfect accuracy and therefore perfect fairness. However  $\mathcal{F}$  is constructed in a way such that  
704 thresholding at 0.5 leads to unfair classification. Furthermore we can define  $\mathcal{F}'$  as a representation  
705 that separates all but two cells  $C' = C_1 \cup C_2$  and  $C'' = C_3$  perfectly by labels. By definition, the  
706 threshold that cuts at 0.5 on featureset  $\mathcal{F}' \cup \{f\}$  is now less fair than the threshold that cuts at 0.5 on  
707 featureset  $\mathcal{F}'$  as the misclassification rates of  $C'$  and  $C''$  affect different groups.

## 708 Impact of feature deletion for other group-fairness notions

709 We can make an observation similar to Theorem 3 for demographic parity and predictive rate parity  
710 (in cases where adversarial fairness w.r.t.  $L^{Pred}$  is possible, i.e., when success rates between groups  
711 are equal). The proofs use Theorem 11 and Theorem 10 from Section A7.

712 **Observation 1.** *For every distribution  $P$  and feature  $f$ , there exists a feature set  $\mathcal{F}$ , such that*  
713 *adding  $f$  will not impact the adversarial fairness w.r.t.  $L^{DP}$  of the distribution, e.g.  $U_{adv}^{DP}(\mathcal{F}) =$*   
714  *$U_{adv}^{DP}(\mathcal{F} \cup \{f\})$ . Furthermore, there exist distributions  $P$ , features  $f$  and  $\mathcal{F}'$ , such that  $U_{adv}^{DP}(\mathcal{F}') = 0$*   
715 *and  $U_{adv}^{DP}(\{f\}) = 0$ , but  $U_{adv}^{DP}(\mathcal{F}' \cup \{f\}) = 1$ .*

716 **Observation 2.** For every distribution  $P$  and feature  $f$ , there exists a feature set  $\mathcal{F}$ , such that adding  $f$   
717 will not impact the adversarial fairness w.r.t.  $L^{\text{Pred}}$  of the distribution, e.g.  $U_{\text{adv}}^{\text{Pred}}(\mathcal{F}) = U_{\text{adv}}^{\text{Pred}}(\mathcal{F} \cup$   
718  $\{f\})$ . Furthermore, there exist distributions  $P$ , features  $f$  and  $\mathcal{F}'$ , such that  $U_{\text{adv}}^{\text{Pred}}(\mathcal{F}') = 0$  and  
719  $U_{\text{adv}}^{\text{Pred}}(\{f\}) = 0$ , but  $U_{\text{adv}}^{\text{Pred}}(\mathcal{F}' \cup \{f\}) = 1$ .

720 In Section A7, you will also find another observation related to feature deletion, which uses the  
721 terminology of that section(Observation ).

## 722 Proofs

723 **Theorem 2.** For every 6-anonymous non-committing feature  $f$ , there exists a probability function  $P$   
724 over  $X$  and feature sets  $\mathcal{F}$  and  $\mathcal{F}'$  such that:

- 725 • The accuracy-driven fairness w.r.t  $L^{\text{EO}}$ ,  $P$  and  $\alpha = 0.5$  of  $\mathcal{F} \cup \{f\}$  is greater than that of  
726  $\mathcal{F}$ , i.e.

$$U_{\text{acc}}^{\alpha}(\mathcal{F} \cup \{f\}) < U_{\text{acc}}^{\alpha}(\mathcal{F})$$

727 Thus, deleting  $f$  in this context will increase unfairness.

- 728 • The accuracy-driven fairness w.r.t  $L^{\text{EO}}$ ,  $P$  and  $\alpha = 0.5$  of  $\mathcal{F}' \cup \{f\}$  is less than that of  $\mathcal{F}'$ ,  
729 i.e.

$$U_{\text{acc}}^{\alpha}(\mathcal{F}' \cup \{f\}) > U_{\text{acc}}^{\alpha}(\mathcal{F}')$$

730 Thus, deleting  $f$  in this context will decrease unfairness.

731 **Proof of Theorem 2:** In the following, we will denote false negative rates and false positive  
732 rates of the two groups  $A$  and  $D$  for the optimal classifier induced by a feature set  $\mathcal{F}$  as  
733  $FP_{A,\mathcal{F}}$ ,  $FP_{D,\mathcal{F}}$ ,  $FN_{A,\mathcal{F}}$  and  $FN_{D,\mathcal{F}}$ . The difference of false positive rates with respect to  $\mathcal{F}$  will  
734 be denoted by  $\Delta FP_{\mathcal{F}}$  and the difference in false negative rates with respect to  $\mathcal{F}$  will be denoted  
735 by  $\Delta FN_{\mathcal{F}}$ . We will call instances of "A" advantaged and instances of "D" disadvantaged. Further-  
736 more, we call instances with ground-truth label "1" deserving and those with ground truth label "0"  
737 undeserving.

738 For each case will will start by listing sufficient requirements for the effect of deleting  $f_i$  being  
739 an increase/decrease of features. We find that those scenarios are quite likely to appear in reality.  
740 However, when we focus on constructing the examples, we will focus on making the construction as  
741 simple as possible, rather than modeling a realistic scenario.

742 On a high level this proof will construct the two feature sets  $\mathcal{F}$  and  $\mathcal{F}'$  such that in both cases there  
743 exist only three cells that include mislabeled instances. Furthermore the union of those cells for  
744 featurization  $\mathcal{F}$  and the union of those cells for the featurization  $\mathcal{F}'$  will be chosen to be disjoint.  
745 This way we can pick  $P$  independently for both cases. Furthermore there will be instances of each  
746  $X_{A,1}$ ,  $X_{A,0}$ ,  $X_{D,1}$  and  $X_{D,0}$  are not in either of those cells. This way we can ensure that most of the  
747 probability mass does not sit in either of those cells and therefore control for normalizing factors.  
748 This makes it possible to choose  $P$  in a way to fulfill all the inequalities.

749 We first consider the case where deleting  $f_i$  increases fairness. We will choose  $f_1, \dots, f_{i-1}$  in such a  
750 way that deleting  $f_i$  from  $\{f_1, \dots, f_{i-1}, f_i\}$  decreases fairness. We will first give a list of properties  
751 that such a set  $f_1, \dots, f_{i-1}$  should fulfill and then argue why they can all be fulfilled simultaneously.  
752 We propose  $f_1, \dots, f_{i-1}$  be chosen in a way such that deleting  $f_i$  from  $f_1, \dots, f_{i-1}, f_i$  conserves all  
753 but two cells  $C_i^0$  and  $C_i^1$  of the featurization  $\{f_1, \dots, f_{i-1}, f_i\}$ . The two cells  $C_i^0$  and  $C_i^1$  are merged  
754 by the deletion of  $f_i$  into  $C_i$  such that

1.  $C_i$  has majority label 1, i.e.

$$P((X_{A,0} \cup X_{D,0}) \cap C_i) < P((X_{A,1} \cup X_{D,1}) \cap C_i)$$

755  $C_i^0$  only consists of disadvantaged undeserving and advantaged deserving people

2.  $C_i^0$  has majority label 0, i.e.

$$P((X_{A,0} \cup X_{D,0}) \cap C_i^0) > P((X_{A,1} \cup X_{D,1}) \cap C_i^0)$$

3. false positive rate of  $A$  is higher than of  $D$ :

$$A(FP_{\mathcal{F}}) > D(FP_{\mathcal{F}})$$



4. after deleting  $f_i$  the false positive rate of  $A$  will still be higher than that of  $D$ :

$$\Delta FP_{\mathcal{F}} > \frac{P(C_0^i \cap X_{D,1})}{P(X_{D,1})} - \frac{P(C_0^i \cap X_{A,1})}{P(X_{A,1})}$$

5. false negative rate of  $D$  is higher than of  $A$ :

$$D(FN_{\mathcal{F}}) > A(FN_{\mathcal{F}})$$

6. after deleting  $f_i$  the false negative rate of  $D$  will still be higher than that of  $A$ :

$$\Delta FN_{\mathcal{F}} > \frac{P(C_0^i \cap X_{D,0})}{P(X_{D,0})} - \frac{P(C_0^i \cap X_{A,0})}{P(X_{A,0})}$$

7. switching labels of  $C_i^0$  decreases false negative rate of  $D$  more than that of  $A$ :

$$\frac{P(C_i^0 \cap X_{A,1})}{P(X_{A,1})} < \frac{P(C_i^0 \cap X_{D,1})}{P(X_{D,1})}$$

8. switching labels of  $C_i^0$  increases false positive rate of  $D$  more than that of  $A$ :

$$\frac{P(C_i^0 \cap X_{A,0})}{P(X_{A,0})} < \frac{P(C_i^0 \cap X_{D,0})}{P(X_{D,0})}$$

756 We believe these properties to hold for some realistic sets of features  $\{f_1, \dots, f_{i-1}\}$ . We will now  
757 construct an example for a cell  $C_i = C_i^0 \cup C_i^1$ , such that these properties are actually fulfilled.

758

759 Let  $y_1$  and  $y_2$  be defined as in the definition of non-committing features. We will define  $C_0^i$  as a  
760 subset of the pre-image  $f_i^{-1}(y_1)$  and  $C_1^i$  as a non-empty set that does not contain any elements  
761 of the pre-image  $f_i^{-1}(y_1)$ . This way, we will ensure that deleting the feature  $f_i$  will indeed result  
762 in the merging of cells  $C_0^i$  and  $C_1^i$ . Let  $C_{a,1} = X_{A,1} \cap f^{-1}(y_1)$  and  $C_{d,0} = X_{D,0} \cap f^{-1}(y_1)$   
763 and  $C_{a,0} = X_{A,0} \cap f^{-1}(y_1)$  and  $C_{d,1} = X_{D,1} \cap f^{-1}(y_1)$ . According to our non-committing and  
764 6-anonymity assumption on  $f_i$  all of these sets are non-empty and contain at least 6 elements. We  
765 will only take 3 of those elements for the construction, such that the construction of similar cells for  
766  $\mathcal{F}'$  can be done with the other 3 elements and we can assign probability weights to all of those points  
767 independently. Let  $C_{d,0}^i \subset C_{d,0}$  and  $C_{d,1}^i \dot{\cup} C_{d,1}^{j,0} \dot{\cup} C_{d,1}^{j,1} \subset C_{d,1}$  and  $C_{a,0}^{j,0} \dot{\cup} C_{a,0}^{j,1} = C_{a,0}^j \subset C_{a,0}$  and  
768 choose  $P$  such that

- 769 •  $P(C_{d,0}^i) > P(C_{d,1}^i)$
- 770 •  $\frac{P(C_{d,0}^i)}{P(X_{D,0})} < \frac{P(C_{a,0}^{j,1})}{P(X_{A,0})}$
- 771 •  $P(C_{a,0}^{j,1}) < P(C_{d,1}^{j,1})$
- 772 •  $P(C_{d,1}^{j,0}) < P(C_{a,0}^{j,0})$

One easy way of achieving (2.),(3.) and (4.) is defining  $C_0^i = C_{d,1}^i \cup C_{d,0}^i$ . We can achieve (1.) by  
letting  $C_1^i$  be defined as a subset of  $(X_{A,1} \cap X_{D,1}) \cap (X \setminus f^{-1}(y_i))$  such that  $P(C_1^i) > P(C_0^i)$ .  
This can be done because of  $f_i$  is non-committing. Since one can always introduce more features that  
separate perfectly by label, we can construct  $f_1, \dots, f_{i-1}$  such that  $\{f_1, \dots, f_{i-1}\}$  induces only three  
cells with mixed labels:  $C_i, C_j^1 := C_{a,0}^{j,1} \cup C_{d,1}^{j,1}$  and  $C_j^0 := C_{d,1}^{j,0} \cup C_{a,0}^{j,0}$ . Thus the only misclassified  
instances are in these cells. It is easy to see that this construction achieves (5.)-(8.).

Now we will show that fulfilling (1.)-(8.) implies that deleting  $f_i$  makes the optimal classifier based  
on the featurization more fair with respect to our fairness notion: The only change in false positive  
and false negative rates are introduced to labeling the elements of  $C_i^0$  as 1 instead of 0. Because of  
(3.) and (4.) the change in false positive rate difference induced by the deletion of  $f_i$  is

$$\frac{P(C_0^i \cap X_{A,1})}{P(X_{A,1})} - \frac{P(C_0^i \cap X_{D,1})}{P(X_{D,1})},$$

which is a negative value because of (8.). Because of (5.) and (6.) the change in false negative rate difference induced by the deletion of  $f_i$  is

$$\frac{P(C_0^i \cap X_{D,0})}{P(X_{D,0})} - \frac{P(C_0^i \cap X_{A,0})}{P(X_{A,0})},$$

773 which is a negative value because of (7.). Therefore the deletion of  $f_i$  causes both difference in false  
774 negative rate and difference in false positive rate to decrease.

775 We now consider the case where deleting  $f_i$  decreases fairness. We will again give a list of criteria,  
776 that are sufficient for our claim to hold and then show a more concrete construction that fulfils these  
777 criteria. We can construct  $f'_1, \dots, f'_{i-1}$  such that deleting  $f_i$  from  $f'_1, \dots, f'_{i-1}, f_i$  only merges two  
778 cells  $C_i^1$  and  $C_i^0$  into  $C'_i$ , such that

1.  $C'_i$  has majority label 1, i.e.

$$P((X_{A,0} \cup X_{D,0}) \cap C'_i) < P((X_{A,1} \cup X_{D,1}) \cap C'_i)$$

779  $C_0^i$  only consists of disadvantaged undeserving and advantaged deserving people

2.  $C_i^0$  has majority label 0, i.e.

$$P((X_{A,0} \cup X_{D,0}) \cap C_i^0) > P((X_{A,1} \cup X_{D,1}) \cap C_i^0)$$

3. false positive rate of  $A$  is higher than of  $D$ :

$$A(FP_{\mathcal{F}'}) > D(FP_{\mathcal{F}'})$$

4. after deleting  $f_i$  the false positive rate of  $A$  will still be higher than that of  $D$ :

$$\Delta FP_{\mathcal{F}'} > \frac{P(C_0^i \cap X_{A,1})}{P(X_{A,1})} - \frac{P(C_0^i \cap X_{D,1})}{P(X_{D,1})}$$

780 5. false negative rate of  $D$  is higher than of  $A$ :  $D(FN_{\mathcal{F}'}) > A(FN_{\mathcal{F}'})$

6. after deleting  $f_i$  the false negative rate of  $D$  will still be higher than that of  $A$ :

$$\Delta FN_{\mathcal{F}'} > \frac{P(C_0^i \cap X_{A,0})}{P(X_{A,0})} - \frac{P(C_0^i \cap X_{D,0})}{P(X_{D,0})}$$

7. switching labels of  $C_i^0$  decreases false negative rate of  $A$  more than that of  $D$ :

$$\frac{P(C_i^0 \cap X_{D,1})}{P(X_{D,1})} < \frac{P(C_i^0 \cap X_{A,1})}{P(X_{A,1})}$$

8. switching labels of  $C_i^0$  increases false positive rate of  $A$  more than that of  $D$ :

$$\frac{P(C_i^0 \cap X_{D,0})}{P(X_{D,0})} < \frac{P(C_i^0 \cap X_{A,0})}{P(X_{A,0})}$$

781 We will define  $C_0^i$  as a subset of the preimage  $f_i^{-1}(y_2)$  and  $C_1^i$  as a non-empty set that does not  
782 contain any elements of the preimage  $f_i^{-1}(y_2)$ . This way, we will ensure that deleting the feature  $f_i$   
783 will indeed result in the merging of cells  $C_0^i$  and  $C_1^i$ . Let  $C_{d,0}, C_{d,1}, C_{a,0}$  and  $C_{a,1}$  be defined as  
784 before. Let  $C'_{a,1} \subset C_{a,1}$  and  $C'_{a,0} \cup C'_{a,0}{}^{j,0} \cup C'_{a,0}{}^{j,1} \subset C_{a,0}$ ,  $C'_{d,1}{}^{j,0} \cup C'_{d,1}{}^{j,1} = C_{d,1}^j \subset C_{d,1}$ , such  
785 that they are disjoint from all the non-perfectly labeled cells in the featurization  $\mathcal{F}_1$ . Therefore we  
786 can choose  $P$  in such a way that

- 787 •  $P(C'_{a,0}{}^i) > P(C'_{a,1}{}^i)$
- 788 •  $\frac{P(C'_{a,0}{}^i)}{P(X_{A,0})} < \frac{P(C'_{a,0}{}^{j,1})}{P(X_{A,0})}$
- 789 •  $P(C'_{a,0}{}^{j,1}) < P(C'_{d,1}{}^{j,1})$ ,
- 790 •  $P(C'_{d,1}{}^{j,0}) < P(C'_{a,0}{}^{j,0})$ ,

791 Similar to the above case, a way of achieving (2),(3.) and (4.) is defining  $C_0^i = C_{a,1}^i \cup C_{a,0}^i$ .  
792 We can achieve (1) by defining  $C_i^1$  as a subset of  $(X_{A,1} \cap X_{D,1}) \cap (X \setminus f^{-1}(y_2))$  such that  
793  $P(C_i^1) > P(C_i^0)$ . This can be done because of the second assumption for  $f_i$ . Since one can  
794 always introduce more features that separate perfectly by label, we can construct  $f_1, \dots, f_{i-1}$  such  
795 that  $\{f_1, \dots, f_{i-1}\}$  induces only three cells with mixed labels:  $C_i^1, C_j^1 := C_{a,0}^{j,1} \cup C_{a,1}^{j,1}$  and  
796  $C_j^0 := C_{a,1}^{j,0} \cup C_{a,0}^{j,0}$ . Thus the only misclassified instances are in these cells. It is easy to check  
797 that this construction achieves (5.)-(8.).

Because of (3.) and (4.) the change in false positive rate difference induced by the deletion of  $f_i$  is

$$\frac{P(C_0^i \cap X_{A,1})}{P(X_{A,1})} - \frac{P(C_0^i \cap X_{D,1})}{P(X_{D,1})},$$

which is a positive value because of (8.). Because of (5.) and (6.) the change in false negative rate difference induced by the deletion of  $f_i$  is

$$\frac{P(C_0^i \cap X_{D,0})}{P(X_{D,0})} - \frac{P(C_0^i \cap X_{A,0})}{P(X_{A,0})},$$

798 which is a positive value because of (7.). Therefore the deletion of  $f_i$  causes both difference in false  
799 negative rate and difference in false positive rate to increase.

800  $\square$

801 **Theorem 3.** 1. For every distribution  $P$  and feature  $f$ , there exists a feature set  $\mathcal{F}$ , such that  
802 adding  $f$  will not impact the fairness of the distribution, e.g.  $U_{adv}(\mathcal{F}) = U_{adv}(\mathcal{F} \cup \{f\})$ .  
803 2. There exist distributions  $P$ , features  $f$  and  $\mathcal{F}'$ , such that  $U_{adv}(\mathcal{F}') = 0$  and  $U_{adv}(\{f\}) = 0$ ,  
804 but  $U_{adv}(\mathcal{F}' \cup \{f\}) = 1$ .

805 **Proof of Theorem 3:**

806 1. For any distribution  $P$  and feature  $f$  we can choose a representation  $\mathcal{F}$  such that  $\mathcal{C}_{\mathcal{F}} =$   
807  $\mathcal{C}_{\mathcal{F} \cup \{f\}}$ . It is obvious that the fairness will not change between those representations.  
808 2. The following example establishes the second claim: Consider the domain  $X =$   
809  $x_1, x_2, x_3, x_4, x_5, x_6, x_7, x_8$  with  $X_{A,1} = \{x_1, x_2\}$ ,  $X_{D,1} = \{x_3, x_4\}$ ,  $X_{A,0} = \{x_5, x_6\}$   
810 and  $X_{D,0} = \{x_7, x_8\}$ . Furthermore let  $\mathcal{F} = \{f_1, f_2\}$  with  $f_1^{-1}(1) = \{x_1, x_3, x_5, x_7\}$   
811 and  $f_2^{-1}(1) = \{x_1, x_4, x_5, x_8\}$ . Furthermore let  $P$  be uniform over  $X$ , i.e.  $P(\{x_1\}) =$   
812  $P(\{x_2\}) = P(\{x_3\}) = P(\{x_4\}) = P(\{x_5\}) = P(\{x_6\}) = P(\{x_7\}) = P(\{x_8\}) =$   
813  $0.125$ . Thus, we have adversarial fairness w.r.t. EO for both features, i.e.

$$\begin{aligned} & \frac{P(X_{A,1} \cap f_1^{-1}(1))}{P(t^{-1}(1) \cap f_1^{-1}(1))} = \frac{P(\{x_1\})}{P(\{x_1, x_2\})} = 0.5 = \\ & \frac{P(\{x_3\})}{P(\{x_3, x_4\})} = \frac{P(X_{D,1} \cap f_1^{-1}(1))}{P(t^{-1}(1) \cap f_1^{-1}(1))}. \\ & \frac{P(X_{A,0} \cap f_1^{-1}(1))}{P(t^{-1}(0) \cap f_1^{-1}(1))} = \frac{P(\{x_5\})}{P(\{x_5, x_6\})} = 0.5 = \\ & = \frac{P(\{x_7\})}{P(\{x_7, x_8\})} = \frac{P(X_{D,0} \cap f_1^{-1}(1))}{P(t^{-1}(0) \cap f_1^{-1}(1))}. \\ & \frac{P(X_{A,1} \cap f_2^{-1}(1))}{P(t^{-1}(1) \cap f_2^{-1}(1))} = \frac{P(\{x_1\})}{P(\{x_1, x_2\})} = 0.5 = \\ & = \frac{P(\{x_4\})}{P(\{x_3, x_4\})} = \frac{P(X_{D,1} \cap f_2^{-1}(1))}{P(t^{-1}(1) \cap f_2^{-1}(1))}. \\ & \frac{P(X_{A,0} \cap f_2^{-1}(1))}{P(t^{-1}(0) \cap f_2^{-1}(1))} = \frac{P(\{x_5\})}{P(\{x_5, x_6\})} = 0.5 \\ & = \frac{P(\{x_8\})}{P(\{x_7, x_8\})} = \frac{P(X_{D,0} \cap f_2^{-1}(1))}{P(t^{-1}(0) \cap f_2^{-1}(1))}. \end{aligned}$$

821 However, the featureset  $\mathcal{F}$  does not have adversarial fairness w.r.t. EO (using Theorem 6)  
822 :  $\mathcal{C}_{\mathcal{F}} = \{C_1, C_2, C_3, C_4\}$  with  $C_1 = \{x_1, x_5\}$ ,  $C_2 = \{x_2, x_6\}$ ,  $C_3 = \{x_3, x_7\}$ , and  
823  $C_4 = \{x_4, x_8\}$ . Consider the classifier  $h \in \mathcal{H}_{\mathcal{F}}$  with  $h^{-1}(1) = \{C_1, C_3\}$ . Then  
824  $L_P^{EO}(h) = \sum_{l \in \{0,1\}} \left| \frac{P(h^{-1}(\{1-l\}) \cap X_{A,l})}{P(X_{A,l})} - \frac{P(h^{-1}(\{1-l\}) \cap X_{D,l})}{P(X_{D,l})} \right| = |\frac{1}{2} - 0| + |0 - \frac{1}{2}| = 1$ .  
825 Thus  $U_{adv}^{EO}(\mathcal{F}) = 1$ .

826  $\square$   
827

828 **Theorem 4.** 1. For any feature  $f$  and any featureset  $\mathcal{F}$  we have  $U_{adv}(\mathcal{F}) \leq U_{adv}(\mathcal{F} \cup \{f\})$ .  
829 Similarly, if the representation  $\mathcal{F}$  is  $(\epsilon, \eta)$ -fairness-enabling, the representation  $\mathcal{F} \cup \{f\}$  is  
830 also  $(\epsilon, \eta)$ -fairness-enabling.

831 2. For every distribution  $P$  and every feature  $f$ , there exists a feature set  $\mathcal{F}$ , such that  $\mathcal{F} \cup \{f\}$   
832 is  $(\eta, \epsilon)$ -fairness-enabling, if and only if  $\mathcal{F}$  is  $(\epsilon, \eta)$ -fairness-enabling. Furthermore, there  
833 exists a distribution  $P$ , a feature  $f$  and a feature set  $\mathcal{F}'$ , such that both  $\mathcal{F}'$  and  $\{f\}$  are not  
834  $(\epsilon, \eta)$ -fairness-enabling for any  $\epsilon, \eta < \frac{1}{2}$ , but such that  $\mathcal{F}' \cup \{f\}$  is  $(0, 0)$ -fairness-enabling.

835 **Proof of Theorem 4:**

836 1. We note that  $\mathcal{H}_{\mathcal{F}} \subset \mathcal{H}_{\mathcal{F} \cup \{f\}}$ . Thus any  $\arg \min_{h \in \mathcal{H}_{\mathcal{F}}} L_P^{EO}(h) \leq$   
837  $\arg \min_{h \in \mathcal{H}_{\mathcal{F} \cup \{f\}}} L_P^{EO}(h)$ , proving the inequality for adversarial fairness. Further-  
838 more any  $h \in \mathcal{H}_{\mathcal{F}}$  with  $\epsilon$  loss and  $\eta$  unfairness, is also an element of  $h \in \mathcal{H}_{\mathcal{F} \cup \{f\}}$ , proving  
839 our claim about the fairness-driven case.

840 2. Similarly to the proof of Theorem 3, given a feature  $f$  and a distribution  $P$ , we can construct  
841 a feature set  $\mathcal{F}$ , such that  $\mathcal{C}_{\mathcal{F}} = \mathcal{C}_{\mathcal{F} \cup \{f\}}$ . Since this implies that  $\mathcal{H}_{\mathcal{F}} = \mathcal{H}_{\mathcal{F} \cup \{f\}}$ , we get the  
842 same fairness-enabling for both distributions.

843 Furthermore we can construct the following example to proof the second claim: Consider  
844 the domain  $X = x_1, x_2, x_3, x_4, x_5, x_6, x_7, x_8$  with  $X_{A,1} = \{x_1, x_2\}$ ,  $X_{D,1} = \{x_3, x_4\}$ ,  
845  $X_{A,0} = \{x_5, x_6\}$  and  $X_{D,0} = \{x_7, x_8\}$ . Furthermore let  $\mathcal{F} = \{f_1, f_2\}$  with  $f_1^{-1}(1) =$   
846  $\{x_1, x_3, x_5, x_7\}$  and  $f_2^{-1}(1) = \{x_1, x_3, x_6, x_8\}$ . Furthermore let  $P$  be uniform over  $X$ , i.e.  
847  $P(\{x_1\}) = P(\{x_2\}) = P(\{x_3\}) = P(\{x_4\}) = P(\{x_5\}) = P(\{x_6\}) = P(\{x_7\}) =$   
848  $P(\{x_8\}) = 0.125$ . On both  $\{f_1\}$  and  $\{f_2\}$  there are no classifier  $h_1 \in \mathcal{H}_{\{\infty\}}$  or  $h_2 \in$   
849  $\mathcal{H}_{\{\epsilon\}}$  with  $L_P^\alpha(h_1) < \frac{1}{2}$  or  $L_P^\alpha(h_2) < \frac{1}{2}$  respectively for any  $\alpha \in (0, 1)$ . Therefore  $\{f_1\}$   
850 and  $\{f_2\}$  are both not  $(\epsilon, \eta)$ -best case fair for any  $\epsilon, \eta < \frac{1}{2}$ . Furthermore, the classifier  $h_3$   
851 defined by  $h^{-1}(1) = \{x_1, x_2, x_3, x_4\}$  is element of  $\mathcal{H}_{\{f_1\} \cup \{f_2\}}$  and has loss  $L_P^\alpha(h) = 0$  and  
852 unfairness  $L_P^{EO}(h) = 0$ . Thus  $\{f_1\} \cup \{f_2\}$  is  $(0, 0)$ -fairness-enabling for any  $\alpha \in (0, 1)$ .

853  $\square$

854 **Observation 1.** For every distribution  $P$  and feature  $f$ , there exists a feature set  $\mathcal{F}$ , such that  
855 adding  $f$  will not impact the adversarial fairness w.r.t.  $L^{DP}$  of the distribution, e.g.  $U_{adv}^{DP}(\mathcal{F}) =$   
856  $U_{adv}^{DP}(\mathcal{F} \cup \{f\})$ . Furthermore, there exist distributions  $P$ , features  $f$  and  $\mathcal{F}'$ , such that  $U_{adv}^{DP}(\mathcal{F}') = 0$   
857 and  $U_{adv}^{DP}(\{f\}) = 0$ , but  $U_{adv}^{DP}(\mathcal{F}' \cup \{f\}) = 1$ .

858 **Proof of Observation 1:** Analogous to the Proof of Observation 3 using Theorem 11 and Observa-  
859 tion 3.  $\square$

860 **Observation 2.** For every distribution  $P$  and feature  $f$ , there exists a feature set  $\mathcal{F}$ , such that adding  $f$   
861 will not impact the adversarial fairness w.r.t.  $L^{Pred}$  of the distribution, e.g.  $U_{adv}^{Pred}(\mathcal{F}) = U_{adv}^{Pred}(\mathcal{F} \cap$   
862  $\{f\})$ . Furthermore, there exist distributions  $P$ , features  $f$  and  $\mathcal{F}'$ , such that  $U_{adv}^{Pred}(\mathcal{F}') = 0$  and  
863  $U_{adv}^{Pred}(\{f\}) = 0$ , but  $U_{adv}^{Pred}(\mathcal{F}' \cup \{f\}) = 1$ .

864 **Proof of Observation 2:** Analogous to the Proof of Theorem 3 using Theorem 10 and Observation 3.  
865  $\square$

866 **A6 Impossibility of adversarially fair representations with respect to**  
 867 **predictive rate parity**

868 **Proofs**

869 **Theorem 5.** *Adversarial fairness w.r.t.  $P$  and  $L^{Pred}$  is only possible, if  $P$  has equal success rates*  
 870 *for both groups.*

871 **Proof of Theorem 5:** We note that in order to achieve adversarial fairness with respect to any  
 872 representation, the all-one classifier needs to be fair, as any representation  $F$  admits any constant  
 873 classifier. We furthermore note that the all-one classifier is fair with respect to predictive rate parity if  
 874 and only if the ground truth has equal success rates. This shows our claim.

875  $\square$

876 **A7 Characterizations of different notions of fair representations**

877 In this section we characterize accuracy-driven and adversarial representation fairness w.r.t. the  
 878 odds equality notion of classification fairness. We will start by introducing a property we call  
 879 *zero-group knowledge*. It is aimed to prevent an adversary from inferring the group membership  
 880 from the representation, when given access to the ground-truth labels. To ensure that an adversarial  
 881 agent won't be able to infer group-membership, one would of course require the representation to  
 882 have demographic parity. However, in situations where label information is correlated with group  
 883 membership, demographic parity of all features will hurt classification accuracy. In such cases,  
 884 zero-group-knowledge might be a better tool for concealing group-information.

885 We will then see that this property is closely related to adversarial fairness.

886 **Definition 9** (Zero-group-knowledge). *A representation  $F$  has zero-group-knowledge w.r.t.*  
 887 *a distribution  $P$ , if for  $x \sim P$ , knowing the feature vector  $F(x)$  will not reveal more information about*  
 888 *the group membership  $G(x)$  than knowing just the ground truth,  $t(x)$ . Namely,  $G(x) \perp\!\!\!\perp F(x)|t(x)$ .*

889 It turns out that this property is equivalent to adversarial fairness with respect to equalized odds.

890 **Theorem 6.** *A representation  $F$  has zero-group knowledge w.r.t.  $P$  if it has adversarial fairness w.r.t*  
 891 *to  $P$  and the group-fairness measure  $L^{EO}$ .*

892 A similar observation has been made and shown by Zhang et al [17], relating the optimization criteria  
 893 for the goal of concealing group-membership and preventing unfair classification with respect to  
 894 equalized odds in a representation learning setting with GANs.

895 We will now give a characterization of accuracy-driven and worse-case fairness in terms of the  
 896 conditional distributions given label and group-membership over the cells  $\mathcal{C}_{\mathcal{F}}$  of a finite feature set  
 897  $\mathcal{F}$ . In the following we will denote the conditional probabilities given label  $l$  and group  $G$  as  $P_{G,l}$ .  
 898 We will see that a representation is adversarially fair, if and only if the conditional probabilities  
 899 are aligned. It has already been shown in [18] that if conditional probabilities are aligned over a  
 900 representation, every classifier based on that representation is fair. We go a step further here, by  
 901 noting, that this is indeed a necessary condition for adversarial fairness.

902 **Theorem 7.** *A feature set  $\mathcal{F}$  is adversarially fair w.r.t. distribution  $P$  if and only if for each cell*  
 903  *$C \in \mathcal{C}_{\mathcal{F}}$  and for each  $l \in \{0, 1\}$  we have  $P_{A,l}(C) = P_{D,l}(C)$ .*

904 We now give a similar statement for accuracy enforced fairness. Here, the same statement holds, if  
 905 instead of considering the probability distributions over the set of cells  $\mathcal{C}_{\mathcal{F}}$ , we consider the set of  
 906 cells that results from merging all cells of the same score:

907 **Definition 10** (Score-induced cells). *For a set of cells  $\mathcal{C}_{\mathcal{F}}$ , the corresponding set of score-induced*  
 908 *cells  $\mathcal{C}_{\mathcal{F},s_t}$  is the set of cells that is obtained by merging all cells with the same score together. More*  
 909 *formally, each feature set and scoring function, induce an equivalence relation  $\sim_{\mathcal{F},s_t}$ , such that*  
 910  *$x \sim_{\mathcal{F},s_t} y$  if and only if there are cells  $C_x, C_y \in \mathcal{C}_{\mathcal{F}}$  such that  $x \in C_x, y \in C_y$  and  $s_t(C_x) = s_t(C_y)$ .*  
 911 *The set  $\mathcal{C}_{\mathcal{F},s_t}$  is then defined as the set of  $\sim_{\mathcal{F},s_t}$  equivalence classes.*

912 **Theorem 8.** *A feature set  $\mathcal{F}$  is accuracy-driven fair w.r.t. distribution  $P$  if and only if for each cell in*  
 913 *the score-induced  $C \in \mathcal{C}_{\mathcal{F},s_t}$  and for each  $l \in \{0, 1\}$  we have  $P_{A,l}(C) = P_{D,l}(C)$ .*

914 We can now bound the unfairness in terms of accuracy-driven and adversarial fairness of a represen-  
 915 tation by the distribution distance of conditional probabilities. For this we take the  $\mathcal{H}$ -distance as  
 916 introduced by [2].

917 **Definition 11** ( $\mathcal{H}$ -distance). *Given two distributions  $P$  and  $Q$  over  $X$ , we define their  $\mathcal{H}$ -distance by*

$$d_{\mathcal{H}}(P, Q) = \sup_{1_B \in \mathcal{H}} |P(B) - Q(B)|,$$

918 where  $1_B$  denotes the indicator function of set  $B$ .

919 In the following let  $\mathcal{H}_{\mathcal{C}_{\mathcal{F}}, s_t}^{thres} = \{h : \mathcal{C}_{\mathcal{F}} \rightarrow \{0, 1\} : \text{for some } \alpha, h(C) = 0 \text{ iff } s_t(C) < \alpha\}$  be the  
 920 class of all classifiers that are a threshold in the ground-truth scoring. We can now state a quantitative  
 921 theorem about the relation between the conditional alignment and the fairness of a representation:

922 **Theorem 9.** *We can bound adversarial fairness and accuracy enforced fairness of a feature set  
 923  $\mathcal{F}$  w.r.t.  $P$  and  $L^{EO}$  by the  $d_{\mathcal{H}_{\mathcal{F}}}$ -difference and  $d_{\mathcal{H}_{\mathcal{C}_{\mathcal{F}}, s_t}^{thres}}$ -difference of conditional distributions  
 924 respectively:*

$$U_{adv}(\mathcal{F}) \leq \frac{1}{2} d_{\mathcal{H}_{\mathcal{F}}}(P_{A,1}, P_{D,1}) + \frac{1}{2} d_{\mathcal{H}_{\mathcal{F}}}(P_{A,0}, P_{D,0})$$

925

$$U_{acc}(\mathcal{F}) \leq \frac{1}{2} d_{\mathcal{H}_{\mathcal{C}_{\mathcal{F}}, s_t}^{thres}}(P_{A,1}, P_{D,1}) + \frac{1}{2} d_{\mathcal{H}_{\mathcal{C}_{\mathcal{F}}, s_t}^{thres}}(P_{A,0}, P_{D,0})$$

926 Furthermore, we can lower bound the adversarial fairness of a representation by

$$\frac{1}{2} d_{\mathcal{H}_{\mathcal{F}}}(P_{A,l}, P_{D,l}) \leq U_{adv}(\mathcal{F})$$

927 for every  $l \in \{0, 1\}$

928 Note that for both bounds there exist probability distributions  $P$  such that equality holds in all cases.  
 929 Furthermore we note that since the  $\mathcal{H}$ -distance between two distributions can be estimated, if  $\mathcal{H}$  has  
 930 a finite VC-dimension [2], we can estimate both the upper and the lower bound with a sample size  
 931 dependent on  $|\mathcal{C}_{\mathcal{F}}|$ , when given access to i.i.d. samples from  $P_{A,1}, P_{D,1}, P_{D,0}$  and  $P_{A,0}$  each.

932 From Theorem 5 we know that there are distributions for which there is no representation that  
 933 has adversarial fairness with respect to predictive rate parity. In cases, where such a adversarial  
 934 representation is achievable, however, we can characterize it by the following natural requirement on  
 935 the representation, as we will see in the following theorem.

936 **Definition 12.** *A feature set  $\mathcal{F}$  has calibration parity w.r.t. a distribution  $P$  if for every cell  $C \in \mathcal{C}_{\mathcal{F}}$   
 937 both groups have equal success probability. Equivalently, one can say that for a random instance  
 938  $x \in P$  the ground truth labeling  $t(x)$  and the group membership  $G(x)$  are statistically independent,  
 939 when the feature vector  $F(x)$  of  $x$  is known, i.e.  $G(x) \perp\!\!\!\perp t(x) | F(x)$ .*

940 **Theorem 10.** *A feature set  $\mathcal{F}$  has calibration parity w.r.t.  $P$  if it has adversarial fairness w.r.t  $P$   
 941 and the group-fairness measure  $L^{Pred}$ . The other direction does not hold. In particular, adversarial  
 942 fairness w.r.t.  $P$  and  $L^{Pred}$  is only possible, if  $P$  has equal success rates for both groups*

943 **Theorem 11.** *A feature set  $\mathcal{F}$  has demographic parity w.r.t.  $P$  if and only if it has adversarially fair  
 944 w.r.t  $P$  and the group-fairness objective  $L^{DP}$ .*

### 945 Impact of a feature on fairness for other group fairness notions

946 We can make another observation about the impact of feature deletion on unfairness for other notions  
 947 of group fairness.

948 **Observation 3.** • *There exists a distribution  $P$  and a feature set  $\mathcal{F}$  such that each  $f \in \mathcal{F}$  the  
 949 feature set  $\{f\}$  has zero-group-knowledge w.r.t.  $P$ , but  $\mathcal{F}$  is not and  $U_{adv}(\mathcal{F}) = 1$*

• *There exists a distribution  $P$  and a feature set  $\mathcal{F}$  such that each  $f \in \mathcal{F}$ , the feature set  $\{f\}$   
 has demographic parity w.r.t.  $P$ , but  $\mathcal{F}$  has not. Furthermore the group-membership can be  
 perfectly determined by  $\mathcal{F}$ , i.e. for every cell  $C \in \mathcal{C}_{\mathcal{F}}$  we have*

$$\mathbb{P}_{x \sim P}[x \in A | x \in C] \in \{0, 1\}$$

950 • *There exists a distribution  $P$  and a feature set  $\mathcal{F}$  such that each  $f \in \mathcal{F}$ , the feature set  
 951  $\{f\}$  has calibration parity w.r.t.  $P$ , but  $\mathcal{F}$  has not. Furthermore the scores for the different  
 952 groups in each cell are perfectly opposed, i.e.  $C \subseteq A$  or  $C \subseteq D$ .*

953 **Proofs**

954 **Theorem 6.** A feature set  $\mathcal{F}$  has zero-group knowledge w.r.t.  $P$  if it has adversarial fairness w.r.t to  
 955  $P$  and the group-fairness measure  $L^{EO}$ .

956 **Proof of Theorem 6:**

$$\begin{aligned} \frac{P(h^{-1}(1) \cap X_{G,l})}{P(X_{G,l})} &= \frac{\sum_{C \in \mathcal{C}_{\mathcal{F}}: C \in h^{-1}(1)} P(h^{-1}(1) \cap X_{G,l})}{P(X_{G,l})} = \sum_{C \in \mathcal{C}_{\mathcal{F}}: C \in h^{-1}(1)} \frac{P(C \cap X_{G,l})}{P(X_{G,l})} \\ &= \sum_{C \in \mathcal{C}_{\mathcal{F}}: P(C \in h^{-1}(1))} \frac{P(C \cap t^{-1}(l))}{P(t^{-1}(l))} = \frac{P((h^{-1}(1) \cap t^{-1}(l))}{P(t^{-1}(l))} \end{aligned}$$

957 Thus any hypothesis  $h \in \mathcal{H}_{\mathcal{F}}$  is fair w.r.t. to the odds equality notion of fairness.  
 958 Assume  $\mathcal{F}$  does not have zero-group-knowledge. Thus  $F(x)$  and  $G(x)$  are dependent given  
 959 the ground truth  $t(x)$ . Thus there exists label  $l \in \{0, 1\}$ , group  $G \in \{A, D\}$  and a cell  
 960  $C \in \mathcal{C}_{\mathcal{F}}$  with  $\frac{P(C \cap X_{G,l})}{P(X_{G,l})} \neq \frac{P(C \cap t^{-1}(l))}{P(t^{-1}(l))}$ . Now consider the hypothesis class  $h$  defined by  
 961  $h^{-1}(1) = C$ . For this hypothesis we have  $\frac{P(h^{-1}(1) \cap X_{G,l})}{P(X_{G,l})} \neq \frac{P(h^{-1}(1) \cap t^{-1}(l))}{P(t^{-1}(l))}$ . Thus, not  
 962 every hypothesis  $h \in \mathcal{H}_{\mathcal{F}}$  fulfills equalized odds.

963  $\square$

964 **Theorem 7.** A feature set  $\mathcal{F}$  is adversarially fair w.r.t. distribution  $P$  if and only if for each cell  
 965  $C \in \mathcal{C}_{\mathcal{F}}$  and for each  $l \in \{0, 1\}$  we have  $P_{A,l}(C) = P_{D,l}(C)$ .

966 **Proof of Theorem 7:**

967 Assume  $\mathcal{F}$  is adversarially fair w.r.t. to  $P$  and  $L^{EO}$ . This means that every  $h \in \mathcal{H}_{\mathcal{F}}$  is fair w.r.t  
 968 to  $L^{EO}$ . Now take any cell  $C \in \mathcal{C}_{\mathcal{F}}$  and let  $h$  be defined by  $h^{-1}(1) = C$ . Then we know that  
 969  $\frac{P(X_{A,1} \cap C)}{P(X_{A,1})} = \frac{P(X_{D,1} \cap C)}{P(X_{D,1})}$  and  $\frac{P(X_{A,0} \cap C)}{P(X_{A,0})} = \frac{P(X_{D,0} \cap C)}{P(X_{D,0})}$ . Thus, for each  $l \in \{0, 1\}$  we have  
 970  $P_{A,l}(C) = P_{D,l}(C)$ .

972 Now assume, we have for each  $l \in \{0, 1\}$  we have  $P_{A,l}(C) = P_{D,l}(C)$ . Then for any  $h \in \mathcal{H}_{\mathcal{F}}$ , we  
 973 get

$$\begin{aligned} \frac{P(X_{A,l} \cap h^{-1}(1))}{P(X_{A,l})} &= \sum_{C \in h^{-1}(1)} \frac{P(X_{A,l} \cap C)}{P(X_{A,l})} = \\ &= \sum_{C \in h^{-1}(1)} \frac{P(X_{D,l} \cap C)}{P(X_{D,l})} = \frac{P(X_{D,l} \cap h^{-1}(1))}{P(X_{D,l})}. \end{aligned}$$

975 Thus  $L_P^{EO}(h) = 0$ .  $\square$

976 **Theorem 8.** A feature set  $\mathcal{F}$  is accuracy-driven fair w.r.t. distribution  $P$  if and only if for each cell in  
 977 the score-induced  $C \in \mathcal{C}_{\mathcal{F}_{s_t}}$  and for each  $l \in \{0, 1\}$  we have  $P_{A,l}(C) = P_{D,l}(C)$ .

978 **Proof of Theorem 8:** "Conditional probabilities over score-cells align" implies "representation is  
 979 accuracy-driven fair": We know for every cell  $C \in \mathcal{C}_{\mathcal{F}_{s_t}}$

$$\mathbb{P}_{x \sim P}[x \in C | x \in A, t(x) = 0] = \mathbb{P}_{x \sim P}[x \in C | x \in D, t(x) = 0]$$

980 and

$$\mathbb{P}_{x \sim P}[x \in C | x \in A, t(x) = 1] = \mathbb{P}_{x \sim P}[x \in C | x \in D, t(x) = 1].$$

981 Thus for every threshold  $\alpha \in [0, 1]$ , we have  $\mathbb{P}_{x \sim P}[t_{P,F}^{\alpha}(x) | x \in A, t(x) = 1] = \mathbb{P}_{x \sim P}[t_{P,F}^{\alpha}(x) | x \in$   
 982  $D, t(x) = 1]$  and  $\mathbb{P}_{x \sim P}[t_{P,F}^{\alpha}(x) | x \in A, t(x) = 0] = \mathbb{P}_{x \sim P}[t_{P,F}^{\alpha}(x) | x \in D, t(x) = 0]$ . This implies  
 983 equal false-positive and false-negative rates and therefore group fairness.

984

985 " conditional probabilities over score-cells do not align" implies "representation is not accuracy-  
 986 driven fair": We assume that the conditional probabilities over score induced cells are not aligned.

987 Let  $\mathcal{C}_{\mathcal{F}^{score}} = \{C_1, \dots, C_{k'}\}$  such that  $s_t(C_i) < s_t(C_j)$  for every  $i < j$ . Thus,  $C_i \in \mathcal{C}_{\mathcal{F}^{s_t}}$  with  
 988  $\mathbb{P}_{x \sim P}[x \in C_i | \in A, t(x) = 0] \neq \mathbb{P}_{x \sim P}[x \in C_i | x \in D, t(x) = 0]$  or  $\mathbb{P}_{x \sim P}[x \in C_i | \in A, t(x) =$   
 989  $1] \neq \mathbb{P}_{x \sim P}[x \in C_i | x \in D, t(x) = 1]$ . Now consider the threshold classifier with threshold  $s_t(C_i)$ .  
 990 We can consider two cases:

- 991 • Case 1:  $\frac{P(t_{P,F}^{s(C_i)-1}(0) \cap X_{A,1})}{P(X_{A,1})} \neq \frac{P(t_{P,F}^{s(C_i)-1}(0) \cap X_{D,1})}{P(X_{D,1})}$  or  $\frac{P(t_{P,F}^{s(C_i)-1}(1) \cap X_{A,0})}{P(X_{A,0})} \neq$   
 992  $\frac{P(t_{P,F}^{s(C_i)-1}(1) \cap X_{D,0})}{P(X_{D,0})}$ . This implies  $L_{F,P}^{fair}(t_{P,F}^{s(C_i)}) > 0$ . In this case, the Bayes classifier  
 993 that cuts at  $s_t(C_i)$  is unfair. Thus there exist a threshold classifier that is unfair.
- 994 • Case 2:  $\frac{P(t_{P,F}^{s(C_i)-1}(0) \cap X_{A,1})}{P(X_{A,1})} = \frac{P(t_{P,F}^{s(C_i)-1}(0) \cap X_{D,1})}{P(X_{D,1})}$  and  $\frac{P(t_{P,F}^{s(C_i)-1}(1) \cap X_{A,0})}{P(X_{A,0})} =$   
 995  $\frac{P(t_{P,F}^{s(C_i)-1}(1) \cap X_{D,0})}{P(X_{D,0})}$ .

996 However since  $\mathbb{P}_{x \sim P}[x \in C_i | \in A, t(x) = 0] \neq \mathbb{P}_{x \sim P}[x \in C_i | x \in D, t(x) = 0]$  or  
 997  $\mathbb{P}_{x \sim P}[x \in C_i | \in A, t(x) = 1] \neq \mathbb{P}_{x \sim P}[x \in C_i | x \in D, t(x) = 1]$ , this implies that  $i > 1$ .  
 998 Now consider the threshold classifier with threshold  $s_t(C_{i-1})$ :  $\mathbb{P}_{x \sim P}[t^{s(C_{i-1})}(x) = 0 | \in$   
 999  $A, t(x) = 1]$   
 1000  $= \mathbb{P}_{x \sim P}[t^{s(C_i)}(x) = 0 | \in A, t(x) = 1]$   
 1001  $+ \mathbb{P}_{x \sim P}[x \in C_i | \in A, t(x) = 1]$   
 1002  $\neq \mathbb{P}_{x \sim P}[t^{s(C_i)}(x) = 0 | \in D, t(x) = 1]$   
 1003  $+ \mathbb{P}_{x \sim P}[x \in C_i | \in D, t(x) = 1]$   
 1004  $= \mathbb{P}_{x \sim P}[t^{s(C_{i-1})}(x) = 0 | \in D, t(x) = 1]$  or  $\mathbb{P}_{x \sim P}[t^{s(C_{i-1})}(x) = 1 | \in A, t(x) = 0]$   
 1005  $= \mathbb{P}_{x \sim P}[t^{s(C_i)}(x) = 1 | \in A, t(x) = 0]$   
 1006  $- \mathbb{P}_{x \sim P}[x \in C_i | \in A, t(x) = 0]$   
 1007  $\neq \mathbb{P}_{x \sim P}[t^{s(C_i)}(x) = 0 | \in D, t(x) = 0]$   
 1008  $- \mathbb{P}_{x \sim P}[x \in C_i | \in D, t(x) = 1]$   
 1009  $= \mathbb{P}_{x \sim P}[t^{s(C_{i-1})}(x) = 1 | \in D, t(x) = 0]$  Which implies  $L_P^{EO}(t^{s(C_{i-1})}) > 0$ . Thus there  
 1010 exist a threshold classifier that is unfair.

1011  $\square$

1012 **Theorem 9.** We can bound adversarial fairness and accuracy enforced fairness of a feature set  $\mathcal{F}$   
 1013 w.r.t.  $P$  and  $L^{EO}$  by the  $d_{\mathcal{C}_{\mathcal{F}}}$ -difference and  $d_{\mathcal{C}_{\mathcal{F},s_t}}$ -difference of conditional distributions respectively:

$$1014 \quad U_{adv}(\mathcal{F}) \leq \frac{1}{2} d_{\mathcal{H}_{\mathcal{F}}}(P_{A,1}, P_{D,1}) + \frac{1}{2} d_{\mathcal{H}_{\mathcal{F}}}(P_{A,0}, P_{D,0})$$

$$1015 \quad U_{acc}(\mathcal{F}) \leq \frac{1}{2} d_{\mathcal{H}_{\mathcal{C}_{\mathcal{F},s_t}}^{thres}}(P_{A,1}, P_{D,1}) + \frac{1}{2} d_{\mathcal{H}_{\mathcal{C}_{\mathcal{F},s_t}}^{thres}}(P_{A,0}, P_{D,0})$$

1015 Furthermore, we can lower bound the adversarial fairness of a representation by

$$\frac{1}{2} d_{\mathcal{H}_{\mathcal{F}}}(P_{A,l}, P_{D,l}) \leq U_{adv}(\mathcal{F})$$

1016 for every  $l \in \{0, 1\}$

1017 **Proof of Theorem 9:**  $U_{adv}(\mathcal{F}) = \max_{h \in \mathcal{H}_{\mathcal{C}_{\mathcal{F}}}} L_P^{EO}(h)$

$$1018 = \max_{h \in \mathcal{H}_{\mathcal{F}}} \sum_{l \in \{0,1\}} \frac{1}{2} \left| \frac{P(h^{-1}(1-l) \cap X_{A,l})}{P(X_{A,l})} - \frac{P(h^{-1}(1-l) \cap X_{D,l})}{P(X_{D,l})} \right|$$

$$1019 \leq \frac{1}{2} \sup_{1_B \in \mathcal{H}_{\mathcal{F}}} |P_{A,1}(B) - P_{D,1}(B)| + \frac{1}{2} \sup_{1_B \in \mathcal{H}_{\mathcal{F}}} |P_{A,0}(B) - P_{D,0}(B)|$$

$$1020 = \frac{1}{2} d_{\mathcal{H}_{\mathcal{F}}}(P_{A,1}, P_{D,1}) + \frac{1}{2} d_{\mathcal{H}_{\mathcal{F}}}(P_{A,0}, P_{D,0})$$

1021  $U_{acc}(\mathcal{F}) \leq \max_{h \in \mathcal{H}_{\mathcal{F}}} L_P^{EO}(h)$

$$1022 = \max_{h \in \mathcal{H}_{\mathcal{F}}} \sum_{l \in \{0,1\}} \frac{1}{2} \left| \frac{P(h^{-1}(1-l) \cap X_{A,l})}{P(X_{A,l})} - \frac{P(h^{-1}(1-l) \cap X_{D,l})}{P(X_{D,l})} \right|$$

$$1023 \leq \frac{1}{2} \sup_{1_B \in \mathcal{H}_{\mathcal{C}_{\mathcal{F},s_t}}^{thres}} |P_{A,1}(B) - P_{D,1}(B)|$$

$$1024 + \frac{1}{2} \sup_{1_B \in \mathcal{H}_{\mathcal{C}_{\mathcal{F},s_t}}^{thres}} |P_{A,0}(B) - P_{D,0}(B)|$$

1025  $= \frac{1}{2} d_{\mathcal{H}_{\mathcal{C}_{\mathcal{F},s_t}}^{thres}}(P_{A,1}, P_{D,1}) + \frac{1}{2} d_{\mathcal{H}_{\mathcal{C}_{\mathcal{F},s_t}}^{thres}}(P_{A,0}, P_{D,0})$  Furthermore, for any label  $l' \in \{0, 1\}$ , we get

1026  $U_{adv}(\mathcal{F}) = \max_{h \in \mathcal{H}_{\mathcal{F}}} L_P^{EO}(h)$

$$1027 = \max_{h \in \mathcal{H}_{\mathcal{F}}} \sum_{l \in \{0,1\}} \frac{1}{2} \left| \frac{P(h^{-1}(1-l) \cap X_{A,l})}{P(X_{A,l})} - \frac{P(h^{-1}(1-l) \cap X_{D,l})}{P(X_{D,l})} \right|$$



$$\begin{aligned}
1028 & \geq \frac{1}{2} \max_{h \in \mathcal{H}_F} \left| \frac{P(h^{-1}(1-l') \cap X_{A,l})}{P(X_{A,l'})} - \frac{P(h^{-1}(1-l') \cap X_{D,l})}{P(X_{D,l'})} \right| \\
1029 & = \frac{1}{2} \sup_{1_B \in \mathcal{H}_F} |P_{A,l'}(B) - P_{D,l'}(B)| \\
1030 & = \frac{1}{2} d_{\mathcal{H}_F}(P_{A,l}, P_{D,l})
\end{aligned}$$

1031  $\square$

1032 **Theorem 10.** *A feature set  $\mathcal{F}$  has calibration parity w.r.t.  $P$  if it has adversarial fairness w.r.t.  $P$*   
1033 *and the group-fairness measure  $L^{P_{red}}$ . The other direction does not hold. In particular, adversarial*  
1034 *fairness w.r.t.  $P$  and  $L^{P_{red}}$  is only possible, if  $P$  has equal success rates for both groups*

1035 **Proof of Theorem 10:** Assume  $\mathcal{F}$  does not have calibration parity. Thus  $t(x)$  and  $G(x)$  are  
1036 dependent given a feature vector. Thus there exists label  $l \in \{0, 1\}$ , group  $G \in \{A, D\}$  and a  
1037 cell  $C \in \mathcal{C}_{\mathcal{F}}$  with  $\frac{P(C \cap X_{G,l})}{P(C \cap G)} \neq \frac{P(C \cap t^{-1}(l))}{P(C)}$ . Now consider the hypothesis class  $h$  defined by  
1038  $h^{-1}(1) = C$ . For this hypothesis we have  $\frac{P(h^{-1}(1) \cap X_{G,l})}{P(h^{-1}(1) \cap G)} \neq \frac{P(h^{-1}(1) \cap t^{-1}(l))}{P(h^{-1}(1))}$ . Thus, not every  
1039 hypothesis  $h \in \mathcal{H}_{\mathcal{F}}$  fulfills predictive rate parity.

1040 The reverse statement is not true. Let  $\mathcal{C}_{\mathcal{F}} = \{C_1, C_2\}$  be such that  $P(C_1 \cap X_{A,1}) = 0.5$ ,  $P(C_1 \cap$   
1041  $X_{A,0}) = 0.1$ ,  $P(C_1 \cap X_{D,1}) = 0.2$ ,  $P(C_1 \cap X_{A,1}) = 0.04$  and  $P(C_2 \cap X_{A,1}) = P(C_2 \cap X_{A,0}) =$   
1042  $P(C_1 \cap X_{D,1}) = P(C_1 \cap X_{A,1}) = 0.04$ . The classifier  $h$  defined by  $h(C) = 1$  for every  $C \in \mathcal{C}_{\mathcal{F}}$   
1043 does not have predictive rate parity, since  $\frac{P(h^{-1}(1) \cap X_{A,0})}{P(h^{-1}(1) \cap A)} = \frac{P(X_{A,0})}{P(A)} = \frac{14}{68} \neq \frac{22}{100} = P(t^{-1}(1)) =$   
1044  $\frac{P(h^{-1}(1) \cap X_{A,0})}{P(h^{-1}(1) \cap A)}$ . Moreover, adversarial predictive parity is only possible in cases where  
1045 success rates are equal, since unequal success rates always implies that the classifier  $h$  defined by  
1046  $h(C) = 1$  for every  $C \in \mathcal{C}_{\mathcal{F}}$  does not fulfill predictive rate parity.  $\square$

1047 **Theorem 11.** *A feature set  $\mathcal{F}$  has demographic parity w.r.t.  $P$  if and only if it has adversarially fair*  
1048 *w.r.t.  $P$  and the group-fairness objective  $L^{DP}$ .*

1049 **Proof of Theorem 11:**

- **Demographic Parity:** Assume  $\mathcal{F}$  has demographic parity, then we have for every cell  
 $C \in \mathcal{C}_{\mathcal{F}}$ :  $\frac{P(A \cap C)}{P(C)} = P(A)$ . Thus, we have for any  $h \in \mathcal{H}_{\mathcal{F}}$ :

$$\begin{aligned}
& \frac{P(h^{-1}(1) \cap A)}{P(h^{-1}(1))} = \frac{\sum_{C \in \mathcal{C}_{\mathcal{F}}: C \in h^{-1}(1)} P(C \cap A)}{P(h^{-1}(1))} \\
& = \frac{\sum_{C \in \mathcal{C}_{\mathcal{F}}: C \in h^{-1}(1)} P(C)P(A)}{P(h^{-1}(1))} = \frac{P(A) \sum_{C \in \mathcal{C}_{\mathcal{F}}: C \in h^{-1}(1)} P(C)}{P(h^{-1}(1))} = \frac{P(A)P(h^{-1}(1))}{P(h^{-1}(1))} = P(A)
\end{aligned}$$

1050 Thus any  $h \in \mathcal{H}_{\mathcal{F}}$  also has demographic parity.

1051

- Assume  $\mathcal{F}$  does not have demographic parity. Thus, there exists at least one cell  $C \in \mathcal{C}_{\mathcal{F}}$   
1052 with  $\frac{P(A \cap C)}{P(C)} \neq P(A)$ . Now consider the hypothesis class  $h$  defined by  $h^{-1}(1) = C$ . For  
1053 this hypothesis we have  $\frac{P(h^{-1}(1) \cap A)}{P(h^{-1}(1))} \neq P(A)$ . Thus, not every hypothesis  $h \in \mathcal{H}_{\mathcal{F}}$  has  
1054 demographic parity.  
1055

1056  $\square$

1057 **Observation 3.** • *There exists a distribution  $P$  and a feature set  $\mathcal{F}$  such that each  $f \in \mathcal{F}$  the*  
1058 *feature set  $\{f\}$  has zero-group-knowledge w.r.t.  $P$ , but  $\mathcal{F}$  is not and  $U_{adv}(\mathcal{F}) = 1$*

- *There exists a distribution  $P$  and a feature set  $\mathcal{F}$  such that each  $f \in \mathcal{F}$ , the feature set  $\{f\}$*   
*has demographic parity w.r.t.  $P$ , but  $\mathcal{F}$  has not. Furthermore the group-membership can be*  
*perfectly determined by  $\mathcal{F}$ , i.e. for every cell  $C \in \mathcal{C}_{\mathcal{F}}$  we have*

$$\mathbb{P}_{x \sim P}[x \in A | x \in C] \in \{0, 1\}$$

- *There exists a distribution  $P$  and a feature set  $\mathcal{F}$  such that each  $f \in \mathcal{F}$ , the feature set*  
 *$\{f\}$  has calibration parity w.r.t.  $P$ , but  $\mathcal{F}$  has not. Furthermore the scores for the different*  
*groups in each cell are perfectly opposed, i.e.  $C \subseteq A$  or  $C \subseteq D$ .*

1059

1061

1062 **Proof of Observation 3:**

1063 • **(zero-group-knowledge)** Consider the domain  $X = x_1, x_2, x_3, x_4, x_5, x_6, x_7, x_8$  with  
 1064  $X_{A,1} = x_1, x_2, X_{D,1} = x_3, x_4, X_{A,0} = x_5, x_6$  and  $X_{D,0} = x_7, x_8$ . Furthermore let  
 1065  $\mathcal{F} = \{f_1, f_2\}$  with  $f_1^{-1}(1) = \{x_1, x_3, x_5, x_7\}$  and  $f_2^{-1}(1) = \{x_1, x_4, x_5, x_8\}$ . Further-  
 1066 more let  $P$  be uniform over  $X$ , i.e.  $P(\{x_1\}) = P(\{x_2\}) = P(\{x_3\}) = P(\{x_4\}) =$   
 1067  $P(\{x_5\}) = P(\{x_6\}) = P(\{x_7\}) = P(\{x_8\}) = 0.125$ . Thus, we have zero-group-  
 1068 knowledge for both features, i.e.

$$\frac{P(X_{A,1} \cap f_1^{-1}(1))}{P(t^{-1}(1) \cap f_1^{-1}(1))} = \frac{P(\{x_1\})}{P(\{x_1, x_2\})} = 0.5$$

1069

$$= \frac{P(\{x_3\})}{P(\{x_3, x_4\})} = \frac{P(X_{D,1} \cap f_1^{-1}(1))}{P(t^{-1}(1) \cap f_1^{-1}(1))}.$$

1070

$$\frac{P(X_{A,0} \cap f_1^{-1}(1))}{P(t^{-1}(0) \cap f_1^{-1}(1))} = \frac{P(\{x_5\})}{P(\{x_5, x_6\})} = 0.5$$

1071

$$= \frac{P(\{x_7\})}{P(\{x_7, x_8\})} = \frac{P(X_{D,0} \cap f_1^{-1}(1))}{P(t^{-1}(0) \cap f_1^{-1}(1))}.$$

1072

$$\frac{P(X_{A,1} \cap f_2^{-1}(1))}{P(t^{-1}(1) \cap f_2^{-1}(1))} = \frac{P(\{x_1\})}{P(\{x_1, x_2\})} = 0.5$$

1073

$$= \frac{P(\{x_4\})}{P(\{x_3, x_4\})} = \frac{P(X_{D,1} \cap f_2^{-1}(1))}{P(t^{-1}(1) \cap f_2^{-1}(1))}.$$

1074

$$\frac{P(X_{A,0} \cap f_2^{-1}(1))}{P(t^{-1}(0) \cap f_2^{-1}(1))} = \frac{P(\{x_5\})}{P(\{x_5, x_6\})} = 0.5$$

1075

$$= \frac{P(\{x_8\})}{P(\{x_7, x_8\})} = \frac{P(X_{D,0} \cap f_2^{-1}(1))}{P(t^{-1}(0) \cap f_2^{-1}(1))}.$$

1076 However, the featureset  $\mathcal{F}$  does not have zero-group-knowledge (using Theorem 6) :  
 1077  $\mathcal{C}_{\mathcal{F}} = \{C_1, C_2, C_3, C_4\}$  with  $C_1 = \{x_1, x_5\}$ ,  $C_2 = \{x_2, x_6\}$ ,  $C_3 = \{x_3, x_7\}$ , and  
 1078  $C_4 = \{x_4, x_8\}$ . Consider the classifier  $h \in \mathcal{H}_{\mathcal{F}}$  with  $h^{-1}(1) = \{C_1, C_3\}$ . Then  
 1079  $L_P^{EO}(h) = \sum_{l \in \{0,1\}} \left| \frac{P(h^{-1}(\{1-l\}) \cap X_{A,l})}{P(X_{A,l})} - \frac{P(h^{-1}(\{1-l\}) \cap X_{D,l})}{P(X_{D,l})} \right| = |\frac{1}{2} - 0| + |0 - \frac{1}{2}| = 1$ .  
 1080 Thus  $U_{adv}^{EO}(\mathcal{F}) = 1$ .

1081 • **(demographic parity)** Consider the domain  $X = x_1, x_2, x_3, x_4$  with  $A = x_1, x_2$  and  $D =$   
 1082  $x_3, x_4$ . Furthermore let  $\mathcal{F} = \{f_1, f_2\}$  with  $f_1^{-1}(1) = \{x_1, x_3\}$  and  $f_2^{-1}(1) = \{x_1, x_4\}$ .  
 1083 Thus,  $\mathcal{C}_{\mathcal{F}} = X$ . Furthermore let  $P$  be uniform over  $X$ , i.e.  $P(\{x_1\}) = P(\{x_2\}) =$   
 1084  $P(\{x_3\}) = P(\{x_4\}) = 0.25$ . We have demographic parity for both features. However,  
 1085 since  $\mathcal{C}_{\mathcal{F}} = X$ , the featureset does not have demographic parity. Furthermore, the informa-  
 1086 tion from the cells suffice to perfectly predict the group-membership.

1087 • **(calibration parity)** Consider the same domain  $X$ , the same feature set and the same  
 1088 probability distribution  $P$  as in the case of zero-group-knowledge. Furthermore consider the  
 1089 featureset  $\mathcal{F} = \{f_1, f_2\}$  with  $f_1^{-1}(1) = \{x_1, x_3, x_5, x_7\}$  and  $f_2^{-1}(1) = \{x_1, x_4, x_6, x_7\}$ .  
 1090 Both features of  $\mathcal{F}$  have calibration parity, since both sides of each split have success-  
 1091 rate 0.5 for each group. Furthermore the  $\mathcal{F}$  itself does not have calibration parity: We  
 1092 have  $\mathcal{C}_{\mathcal{F}} = \{C_1, C_2, C_3, C_4\}$  with  $C_1 = \{x_1, x_7\}$ ,  $C_2 = \{x_2, x_8\}$ ,  $C_3 = \{x_3, x_5\}$ , and  
 1093  $C_4 = \{x_4, x_6\}$ . Both cells  $C_1$  and  $C_2$  have one element from  $X_{A,1}$  and one from  $X_{D,0}$ .  
 1094 Thus the success rate of elements of group  $A$  is 1 in these cells and the success rate of  
 1095 elements of group  $D$  is 0. Accordingly, both cells  $C_3$  and  $C_4$  have one element from  
 1096  $X_{D,1}$  and one from  $X_{A,0}$ . Thus the success rate of elements of group  $A$  is 0 in these  
 1097 cells and the success rate of elements of group  $D$  is 1 Thus when splitting these cells by  
 1098 group-membership both cells the resulting scores don't remain the same.

1099 □

## 1100 Checklist

- 1101 1. For all authors...
- 1102 (a) Do the main claims made in the abstract and introduction accurately reflect the paper's  
1103 contributions and scope? [Yes] We provide theorems with proofs for all claims made  
1104 in the introduction and appendix
- 1105 (b) Did you describe the limitations of your work? [Yes] The introduction clearly details  
1106 the scope of our paper
- 1107 (c) Did you discuss any potential negative societal impacts of your work? [Yes] We discuss  
1108 potential negative societal impacts at the end of the introduction.
- 1109 (d) Have you read the ethics review guidelines and ensured that your paper conforms to  
1110 them? [Yes]
- 1111 2. If you are including theoretical results...
- 1112 (a) Did you state the full set of assumptions of all theoretical results? [Yes] Every result  
1113 clearly states the assumptions used. In one instance (Theorem 2) we refer to a detailed  
1114 definition of the assumptions in the appendix.
- 1115 (b) Did you include complete proofs of all theoretical results? [Yes] Many of them were  
1116 referred to the appendix
- 1117 3. If you ran experiments...
- 1118 (a) Did you include the code, data, and instructions needed to reproduce the main experi-  
1119 mental results (either in the supplemental material or as a URL)? [N/A]
- 1120 (b) Did you specify all the training details (e.g., data splits, hyperparameters, how they  
1121 were chosen)? [N/A]
- 1122 (c) Did you report error bars (e.g., with respect to the random seed after running experi-  
1123 ments multiple times)? [N/A]
- 1124 (d) Did you include the total amount of compute and the type of resources used (e.g., type  
1125 of GPUs, internal cluster, or cloud provider)? [N/A]
- 1126 4. If you are using existing assets (e.g., code, data, models) or curating/releasing new assets...
- 1127 (a) If your work uses existing assets, did you cite the creators? [N/A]
- 1128 (b) Did you mention the license of the assets? [N/A]
- 1129 (c) Did you include any new assets either in the supplemental material or as a URL? [N/A]  
1130
- 1131 (d) Did you discuss whether and how consent was obtained from people whose data you're  
1132 using/curating? [N/A]
- 1133 (e) Did you discuss whether the data you are using/curating contains personally identifiable  
1134 information or offensive content? [N/A]
- 1135 5. If you used crowdsourcing or conducted research with human subjects...
- 1136 (a) Did you include the full text of instructions given to participants and screenshots, if  
1137 applicable? [N/A]
- 1138 (b) Did you describe any potential participant risks, with links to Institutional Review  
1139 Board (IRB) approvals, if applicable? [N/A]
- 1140 (c) Did you include the estimated hourly wage paid to participants and the total amount  
1141 spent on participant compensation? [N/A]
